# Supplementary material for: Biological and RNA regulatory function of MOV10 in mammalian germ cells
Source: BMC Biol. 2019 May 14;17:39. doi: 10.1186/s12915-019-0659-z (PMC6515687; doi:10.1186/s12915-019-0659-z)
Supplement: Supplementary file 3 — Table S4. CLIP reads predominantly mapping to miRNA precursors. (XLSX 157 kb) [file 12915_2019_659_MOESM3_ESM.xlsx]

## Sheet: miRBase annotation
Table S4. CLIP reads predominantly mapping to miRNA precursors
Small RNA	Name	Match type
AGTGCTCTTAACCTCTGAGTC	mir-3473f	Precursor variant
ACTGAGCCATCACTCCAGCCCCCA	mir-3473c	Precursor variant
ACCCGCTCCGGCACCGGCCCGCGG	mir-712	Precursor variant
TGGAAGACTAGTGATTTTGTTGTT	mir-7a-1//mir-7a-2	Mature 5' super
TAGGTAGTTTCATGTTGTTGGGTA	mir-196a-1//mir-196a-2	Mature 5' super variant
GGACCTCTGGAAGAGCAGTC	mir-3473f	Precursor variant
GTCTGTGTGTGTTTGGGTCTTGCGCTGGGGGAGGCGGGGTCGAC	mir-714	Precursor
AGCGGCGGCGGCAGCGG	mir-8112//mir-935	Precursor variant
GAGTTCAAGGCCAGTCTGGT	mir-3470b	Precursor variant
GCCTTACAGTTGGATCTC	mir-3471-1//mir-3471-2	Precursor
ATATATATATATGTGTGTGTG	mir-1187//mir-467g	Precursor
GTGTTTGGGTCTTGTGCTGGGGGAGGGGGGGTC	mir-714	Precursor variant
GTGAGTGTGTGTGTGTGTGT	mir-466i	Mature 5' sub/super variant
ATAAGGACATTGGAAGAAGGGAGTCTAGCT	mir-1194	Precursor
ATACACACACACACACACACACACTCAT	mir-466f-2//mir-466i//mir-466q	Precursor variant
TATTTAGAATGGCGCTGATCTG	mir-465c-1//mir-465c-2	Mature 5'
GATCTGAAGAACAAAAAAAAAA	mir-465c-1//mir-465c-2	Precursor variant
ACACACACACACACACACACACACACACATACAC	mir-466q	Precursor variant
ACACACACACACACATGCAAAC	mir-669c	Mature 3' sub/super variant
TTGTAGACCAGGCTGGCCTCGAAC	mir-3470b	Precursor variant
AGTGTGTATGTGAATAT	mir-466h	Precursor variant
CCCAGGCTGGCCTTGAACTC	mir-3470b	Precursor variant
AAGCTGAGTGCATTGTGATTTCCAATAATTGAGGCAGTGGTTCTG	mir-3618	Precursor variant
ACACACACACACACACACACACACACACACACACACG	mir-466q	Precursor variant
ACGTGTGTGTGTGTGTGTGTGT	mir-466i//mir-466k	Precursor variant
GTGCTAGGATTAAAGGCGTG	mir-8111	Precursor variant
GCGTGTGTGTGTGTGTGTGTGTGTGTGTGT	mir-574//mir-466q	Precursor variant
TGTAAACATCCTACACTCTCAGC	mir-30c-1//mir-30c-2	Mature 5'
GTTTGTTTGTTTGTTTGTTGT	mir-1192	Precursor variant
TCGAGGCCAGCCTGGTCTACAAAGT	mir-3470a//mir-3470b	Precursor variant
GATCCAGAGTGCCCGCTGCCTG	mir-680-2	Precursor variant
GCCGGGCGCGGTGGCGCACGCCT	mir-8111	Precursor variant
ATATATATATATATATAC	mir-467g	Precursor variant
ATGGCTCAGTGGGTAAGAGCACTGACTG	mir-3473f	Precursor variant
AGACCAGGCTGGCCTCA	mir-3470a//mir-5118	Precursor variant
AATCCCAGCACTTGGGAGGCAGAG	mir-3470b	Precursor variant
AATTCCAGCACTCGGGAGGCAGAGGC	mir-3470b	Precursor variant
AGGCTAGGCTCACAA	mir-690	Precursor
ACCCTCTCCGGCGCCGGCCCGCGGGACGCCGCGGCGTCCGTGCGC	mir-712	Precursor variant
GTCTCCGCTTCTCCTTCACCCGGGC	mir-712	Precursor variant
GTGTGTGTGTGTGTGCACGCGT	mir-669h//mir-466j	Precursor variant
GTGTGTGTGTGTGTGTGTGTGTGTGTGTGTGTGTGA	mir-466q	Precursor variant
ATACTGGTGAGCAGCCATACCA	mir-1957b	Precursor
GTTAAGAACACTGACTGCTCTTCCT	mir-3473f	Precursor variant
GGTCGGTCGCCCTGCGGTGG	mir-714	Precursor
TGAAAGCCACCATGCTGGGTAAA	mir-742	Mature 3' super
ACTTGGGAGGCAGAGGCAGGCGG	mir-709	Precursor variant
AGCCGTTAAAGGCTAGGCTCAC	mir-690	Precursor variant
GCCCGCTGCCTGGAGCCTGACTTC	mir-680-1//mir-680-2	Precursor variant
ACAATGCATCGTAAAACCTTCAGAAGGAAAGAAT	mir-703	Precursor variant
GGCCGGTCGGTCGCCCTGCGGTGGTTGTCT	mir-714	Precursor
GTGTTTGGGTCTTGCGCTGGGAGAGGCGGGGTCGACCGCTCGCGG	mir-714	Precursor variant
AACTGTATAGTGATTTC	mir-3969	Precursor variant
AAAAATCCGCCTGCCTCTGCCTCC	mir-3470b	Precursor variant
TCCGCTTCTCCTTCACCCGGGCGGTACCCGCTCCGGCGCCGGCC	mir-712	Precursor
GTGTGTTTGGGTCTTGCGCTGGGGAT	mir-714	Precursor variant
ACCCGGGCGGTACCCGCTCC	mir-712	Precursor
TGTGTAGCCTTGGCTGTCCT	mir-3470b	Precursor
TGTTTGGGTCTTGCGCTGGGGGAGGCGGGGTCGACCGCTCGCGG	mir-714	Precursor
AGGACAGCCAGGGCTACACAGAGAAAC	mir-1954	Precursor variant
GGGAATGTAGCTTAGTGGTAG	mir-1928	Precursor variant
GGTTAATGATAACAATGCATCGTAAAACCTTCAGAAGGAAAGAAT	mir-703	Precursor variant
GGTTAAGAGCACTGACTGCTCTTCCAGAGGTCCT	mir-3473f	Precursor variant
TTCTCCTTCACCCGGGCGGTACCCGCTCCGGCGCCGGCCCGC	mir-712	Precursor
CCAGCCTGGTCTATAGAGTGA	mir-3470b	Mature 5' variant
GTGAGTGTGTGTGTGTGTGTGTGAGTGT	mir-466q	Precursor variant
ACGTGAAACTGAAGGACAACGAGAAGAACCGGAAGCTCTTTGATC	mir-8094	Precursor
AGCCTGACCCCCAAGGCTGTCAAGGAGGATCGATGTTCCAGAGAT	mir-680-2	Precursor variant
CTGCGGTGGTTGTCCGTGTGTGTTTGGGTCTTGCGCTGGGGGAGG	mir-714	Precursor variant
GCTGGAGAGATGGCTCAGCCGTTAAAGGCTAGGCTCACAACCA	mir-690	Precursor variant
TTCGGCCCCCATGTCAGCAGATGC	mir-680-1//mir-680-2	Precursor
GTGTCTGTGTGTGTGTCTGTGTGTGT	mir-466q	Precursor variant
GTTCAAGACCAGCCTGGTCTACAGAGTGAGTTCCAGGA	mir-3470b	Precursor variant
ACATACACACATACATATAAATAT	mir-1187	Precursor variant
GTGTGTGTTCGTGTGTGTGTG	mir-466i	Mature 5' super variant
AGCTGGAGAGATGGCTCAGCGGTTAAGAGCACTGA	mir-3473f	Precursor variant
TGTGTTTGGGTCTTGCGCTGGGGGAGGCGGGGTCGACCGCTCGCG	mir-714	Precursor
CACCCGGGCGGTACCCGCTCCGGCGCCGGCCCGCGGGACGCCG	mir-712	Precursor
TAGCAGCACATAATGGTTTGT	mir-15a	Mature 5' sub
GAGTTTGAGGCCAGCCTGTTC	mir-1195	Mature 5' sub variant
ACTCTGTAGACCAGGCTGGCCTGGACCTC	mir-3470b	Precursor variant
ATACATACACACACACACAT	mir-467f	Precursor variant
GTGTGTGTGTGTGTGTGTGAT	mir-466i	Mature 5' super variant
CCTGCGGTGGTTGTCTGTGTGTGTTTGGGTCTTGCGC	mir-714	Precursor
ATATGTGTGTGTGTGTGTGTGTGTGTGTGT	mir-466i	Precursor variant
AAGGCTGTAAAGGAGGATCGATGTTCC	mir-680-2	Precursor variant
AAGCACGACTAGGAGGCCTCTGCACCTTCC	mir-692-2//mir-692-3	Precursor variant
GAGCCCAGCCTGACCCCCAAGGCTGTCGAGGAGGATCAATGTTCC	mir-680-2	Precursor variant
ACCCGGGCGGTACCCGCTCCGGCGCCGGCCCGCGGGACGCGT	mir-712	Precursor variant
TAAAGTGCTGACAGTGCAGA	mir-106b	Mature 5' sub
ATGTACAAACACACACACACACACAC	mir-466k	Precursor variant
TTGGGAGGCAGAGGCAGGTGGATTTCT	mir-1946a	Precursor variant
CATACACACACACACGCAC	mir-466q	Precursor variant
TGTGTGTGTGTGTGTGTGTGTGTGTGTGTGTAT	mir-466i//mir-466q	Precursor variant
TGTGTGTGTGTGTGTGTGTGTG	mir-466i	Mature 5' super
GTGTGTGTGTGTGTGTGTGTGTGTGTGTGTGTGTGGT	mir-466q	Precursor variant
TTCTCCTTCACCCGGGCGTTACCCGCTCCGGCGCCGGCCCGCGGG	mir-712	Precursor variant
ATCTGCCTCTGCTTCCCGAGT	mir-3470b	Precursor variant
ACAGAGAAACCCTGTCTCAAAAAAAAAAAAAAA	mir-5098	Precursor variant
AGATCGATGTGGTGCTCCGGAG	mir-5099	Precursor variant
GTGTGTGTGTGCGTGTGTGTGTGTGTGTGTGTGT	mir-466q	Precursor variant
ACTTGGGAGGCAGAGGCAGGTGAATTTCTGAGTTCAAGGCCAGCC	mir-3470b	Precursor variant
AGTGGCCGGTGGGGCCTGGGCCTACAACACCACCTCTGCAGTCAC	mir-682	Precursor variant
GTCGACGAGGGCCGGTCGGTCGCCCTGCGGTG	mir-714	Precursor variant
GCTCCGGCGCCGGCCCGCGGGACGCCGCGG	mir-712	Precursor
GTCGGTCGCCCTGCGGTTGTTGTC	mir-714	Precursor variant
CGCGGCGTCCGTGCGC	mir-712	Precursor
GTGTTTGGGTCTTGCGCTGGGGGAGGCGGGGTCGACCGCT	mir-714	Precursor
ACACACACACACACAT	mir-466i//mir-1187//mir-466k	Precursor
TGTAAACATCCTTGACTGGAAGT	mir-30e	Mature 5' super variant
TCTGTGTAGCCTTGGCTGTCCTGGAACTC	mir-3470b	Precursor variant
TGTAGATCAGGCTGACCTTGAAC	mir-3470b	Precursor variant
GTGTTTGGGTCTTGTGCTGGGGGAGGCGGGGT	mir-714	Precursor variant
GCCGGTCGGTCGCCCTGCGGTG	mir-714	Precursor
ACTGAGCCATCTCTCCTGCCC	mir-3473f	Precursor variant
AAAACCTTCAGAAGGAAAGAATGTTGTGG	mir-703	Precursor
ATACACACACACACACACACACACACACACACACA	mir-466q	Precursor variant
GTTCCAGAGATAAGATCTAGAGTGCCCGCT	mir-680-2	Precursor variant
ATGCGTGTGTGTGTGTGTGTGT	mir-466i//mir-466k	Precursor variant
ACCCTCTGGGGAGGAGCGTAGTTACAGAAAGAAATGTAGGCTCTT	mir-8108	Precursor
CTCCTTCACCCGGGCGGTACCCACTCCGGCGCCGGCCCGCGGGAC	mir-712	Precursor variant
TTTAGAATGGCGCTGATCTGT	mir-465c-1//mir-465c-2	Mature 5' sub/super variant
GTAGCCTTGGCTGTCCTGGAACT	mir-3470b	Precursor variant
GAGGGCCGGTCGGTCGCCCTGCGGTGGTTGTCTGTGTGTGTTTGG	mir-714	Precursor
GCCTCTGCCTCCTGAGT	mir-3470a	Precursor
TGGGTCTTGCGCTGGGG	mir-714	Precursor
ATTTCTACTCTTGACCAAAGCTTTGTAAGAAAC	mir-1892	Precursor variant
ACACACACACACACACACA	mir-466i	Mature 5' sub
GTGGCAGTTTTAAGTTATTA	mir-703	Precursor
GCTTGACTTGAAGGGAA	mir-684-1	Precursor
CACACACACACACACACACACACACACACACACACACA	mir-466q	Precursor variant
GTTTGTTTTTTTTTTTT	mir-706	Precursor variant
GTTTGGGTCTTGCGCTGGGGGAG	mir-714	Precursor
AAAGAAAAAAAAAAG	mir-290a//mir-290b	Precursor
GTGTGTGTGTGTGTGTGTGTGTGA	mir-466q	Precursor variant
CTCAGTGGTAGAGCACTT	mir-1928	Precursor
GTGAGTTCCAGGACAGCCAGGGCTACACAGAG	mir-3470b	Precursor variant
GTACGTGTGTGTGTGTGTGTGTGTGTGT	mir-466i//mir-466q	Precursor variant
AGCCCTGGCTGTCCTGGAACTCACTCTGTA	mir-3470b	Precursor variant
GTTTGTGTGTGTGTGTGTGTGT	mir-466i	Mature 5' super variant
GTGTGTGTTTGGGTCTTGCGCTGGGGGAGGCGGTGTCGACCGCTC	mir-714	Precursor variant
GTTTGGGTCTTGCGCTGGGGGAGGCGGGGTCGACCGC	mir-714	Precursor
ATATATATATATATATATATAAAT	mir-467g	Precursor variant
CTGCCTCTGCCTCCTCAGTGCTGGGATT	mir-3470a	Precursor variant
TCTTGCGCTGGGGGAGGCGGGGTCGACCGCTCGCGGGG	mir-714	Precursor
AAAAAAAAAATAAAAAAT	mir-7116	Precursor variant
CTCCGCTTCTCCTTCACCCGGGCGGTACCCGCTC	mir-712	Precursor
AAAATAAAACCAAAAAAC	mir-6240	Precursor variant
AACCTTTCCCACGCCTTGGCTCTGAGAGAAGGCAGCGTGGTGGAT	mir-8099-1//mir-8099-2	Precursor
TCCACCTGCCTCTGCCTCCCAAG	mir-709//mir-1946a//mir-3470b	Precursor variant
GATCGATGTGGTGCTCCGGA	mir-5099	Precursor variant
ATCTGGCACTGTGGTTCCTGCATGAAAAC	mir-682	Precursor
GTGTGTGTTTGGGTCTTGCGC	mir-714	Precursor
CTGTGTGTGTTTGGGTCTTGTGCTGGGGGAGGCGGGGTCGACCGC	mir-714	Precursor variant
CAAGGCTGTCAAGGAGGATCGATGTTCCAGAGATAAGATCCA	mir-680-2	Precursor variant
TGGAGAGATGGCTTAGCCGTT	mir-690//mir-3473f	Precursor variant
AGTGCTTTTAACCTCTGAGCCATCTCTCCAGT	mir-3473f	Precursor variant
GCTGCCAGTTGAAGA	mir-22	Precursor
ACCCGCTCCGGTGCCGGCCCGCGGGACGCCGCGGCGTCCGTGCGC	mir-712	Precursor variant
CTGTAATCCCAGCACTC	mir-8111	Precursor variant
AGTGAATGGAAGTCCAAGGATC	mir-1194	Precursor variant
TTTGAGACAGGGTCT	mir-1192	Precursor
AAAGGCTAGGCCCACAACC	mir-690	Precursor variant
AGTTAAGAACACTGACTGCTCTTCC	mir-3473f	Precursor variant
CTTGCGCTGGGGGAGGCGGGGTCGACCGCTCGCGGGGTT	mir-714	Precursor
ATCAATGTTCTAGAGATAAGATCCAGAGTGCCCGC	mir-680-2	Precursor variant
GTGTGTGTGTGTGTGTGTGTGTATGTATGT	mir-466q	Precursor variant
AAAGGCGTGAGCCACCA	mir-1946b	Precursor variant
GATACATATGCAGCTAGAGACAC	mir-6369	Precursor variant
CTTCGCCTGCTTGCTGCGTGAGACTGAGTAACTGCTAGATCCTTG	mir-1194	Precursor variant
CAGCCTGACCCCCAAGGCTGTCAAGGAGGATCAATGTTCCAGAG	mir-680-2	Precursor
ACCCGGGCGGTACCCGCTCCGGCGCCGGCCCGCGGGACGCCGC	mir-712	Precursor
TTGTGTGTGTGTGTGTGTGTGTGTGTGT	mir-466q	Precursor variant
ACTCTATAGACCAGGCTGGCCTT	mir-3470b	Precursor variant
GTGTGTGTATGTGTGTGT	mir-466f-1//mir-466q	Precursor
ACCCGCTCCGGCGCCGGCCCGCGGGACTCCGCGGCGTCCGCGCGC	mir-712	Precursor variant
TCTTCTGCAAGAACAAGTGCTCT	mir-5124a	Precursor variant
AAAACAAACAAACAAACAAAC	mir-1192	Precursor variant
GTCTCCGCTTCTCCTTCACCCGGGCGGTACCCGCTCCGGCGCC	mir-712	Precursor variant
GATTAAAGGTGTGCGCCACCAC	mir-1946b	Precursor variant
AAGGCTGTTAAGGAGGA	mir-680-2	Precursor variant
TGTCCTGGAACTCACTCTGTAGACCAGGCTGGCCTCGAACTCA	mir-3470b	Precursor variant
TGGAGAGATGGCTCAGCCGTT	mir-690//mir-3473f	Precursor variant
AAGGACATTGGAAGAAGGGAGTCT	mir-1194	Precursor
GGACATTGGAAGAAGGG	mir-1194	Precursor
AAGGAGGATCGATGTTCCAGAGATAAGATCCAGAGTGCCCG	mir-680-2	Precursor variant
ACCAGGCTGGCCTTGAACTCAGAAATCCACCTGCCTCTGCC	mir-3470b	Precursor variant
TGACTGCTCTTCCAGAG	mir-3473f	Precursor
GAACCTGGGTCCTCTGGAAGA	mir-5124a	Precursor variant
TACCCGCTCCGGCGC	mir-712	Precursor
AATCCCAGCACTCGGGAGGCAGAGG	mir-3470b	Precursor variant
TCGACGAGGGCCGGTCGGTCGCCCTGCGGT	mir-714	Precursor variant
AGGAACTGCCTTTTTCTCC	mir-185	Mature 5' sub variant
AGTGAATGGAAGTCCAAGGATCTAGCAGTTGC	mir-1194	Precursor variant
AAGAGCACTGACTGCTCTTCCAGAGGTC	mir-3473f	Precursor
CAGAGTTCAAATCCCAG	mir-5100	Precursor variant
ATTTATAATAGCCAGAAGCTGGAC	mir-3472	Precursor variant
ACCCGGGCGGTACCCGCTCCGGCGCCGGCCCGCGGGACGC	mir-712	Precursor
CTGGAGAGATGGCTCAGCCGTT	mir-690//mir-3473f	Precursor variant
ATATATATATATATATATATATATAC	mir-467g	Precursor variant
ATATATATATATATATATATATATACACACACAC	mir-467g	Precursor variant
ACTCACTCTTTAGACCAGGC	mir-3470b	Precursor variant
GCCCGCTGCCTGGCGCCTGACTTCAGCCCCC	mir-680-1//mir-680-2	Precursor variant
TCCCTGAGACCCTAACTTGT	mir-125b-2//mir-125b-1	Mature 5' sub
GACGCCGCGGCGTCCGTGC	mir-712	Precursor
TTTAAGACAGGGTTTCTCTGTGTAGC	mir-5098	Precursor variant
AATTGATGAAATCTCAAGAAAATTCCTCTAGATAGTCAAGTTCTG	mir-3535	Precursor
AGATCAGAAGCCACAGG	mir-6904	Precursor variant
GCCATCTCTCCAGCCCCAGTT	mir-5128	Mature 3' sub variant
ACCTGCCTCTGCCTCCCAAGTGCTGGAACT	mir-3470b	Precursor variant
GCTGGGGGAGGCGGGGTCGAGCGCTCGCGGGGTTGGCGCGGTCGC	mir-714	Precursor variant
CTCTTTCACCCGGGCGGTACCCGCTCCGGCGCCGGCCCGCGGGAC	mir-712	Precursor variant
TCAGTGCATGACAGAATTTGG	mir-152	Mature 3' variant
GTGTGTGTCTGTGTGTGTGTCTGTGTGT	mir-466q	Precursor variant
GTAGCCGGGCGGTGGTGGCAC	mir-1946a	Precursor variant
GTCTGTGTTCTTCCC	mir-6897	Precursor
ATTAAAGGCATGTGCCACCAC	mir-1946b	Precursor variant
GTTTGGGTCTTGCGCTGGGGGAGGCGGGGTCAACCACTCGCGGGG	mir-714	Precursor variant
GCCTTTAGTCCCAGC	mir-3470b	Precursor
CTCCGCTTCTCCTTCACTCGGGCGGTACCCGCTCCGGCGCCGGCC	mir-712	Precursor variant
ACCCGGGCGGTATCCGCTCCGGCGCCGGCCCGCGGGACGCC	mir-712	Precursor variant
ATTCTGCCGCTTTTCCCCTGAGGTAT	mir-8108	Precursor variant
AAGGACATTGGAAGAAGGGAGTCTAGCTCTTGCT	mir-1194	Precursor
GCCTCTGCCTCCCGAGTGCTGGGATT	mir-3470b	Precursor variant
GGTGGTGCATGCCTTCAATCCCAGC	mir-8111	Precursor variant
GTAGCCCTGGCTGTCCTGGAACT	mir-3470b	Precursor variant
GACTTGAAGGGAAAACT	mir-684-1//mir-684-2	Mature 3' sub
ACCCGCTCCGGCGCCGGCCCGCGGGACGCCGCGGCGTCCGCGCGC	mir-712	Precursor variant
TTTAGTCCCAGCACT	mir-3470b	Precursor
TTTTGTTTTGTTTTGTTTT	mir-5098	Precursor
GGCTGGAGAGATGGCTCAGCCGTT	mir-690//mir-3473f	Precursor variant
ACTCTGTAGACCAGGCTGACCTTGAAC	mir-3470b	Precursor variant
ACTATGTAGCCCTGGCTT	mir-1191a	Precursor variant
GAGCCATCTCTCCAGTCCTT	mir-3473b	Mature 3' sub/super variant
TTGGGGCTTGCGCTGGGGGAGGCGGGGTCGACCGCTCGCGGGGTT	mir-714	Precursor variant
AGGGTTTCTTTGTGTAGCCCTGACTGT	mir-5098	Precursor variant
TGCAGGAACTTGTGAGTCTCC	mir-873a	Mature 5' sub/super
GGGCCGGTCGGTCGCCCTGCGGTGGTTGTCTGTGTGTGT	mir-714	Precursor
CTGCGCTGGGGGAGGCGGGGTCGACCGCTCGCGGGGATGGCGCGG	mir-714	Precursor variant
CCCAAAACTAAACAGGATCTATCATGGTGGCACGGAGTCAGCTAG	mir-546	Precursor
ATGTGTGTGTGTGTGTGTGTGTGTGTGTGTGTGTGTG	mir-466q	Precursor variant
GCCAGCCTGGTCTACATCGTG	mir-3470a//mir-3470b	Mature 5' sub/super variant
AACTCTACCCAAGACTT	mir-710	Precursor variant
GTGTGAGTGTGTGTGTGTGTGT	mir-466i	Mature 5' super variant
CCTCTGCCTCCTGAGTGCTG	mir-3470a	Precursor
GGTGGTTGTCTGTGTGT	mir-714	Precursor
AGCTGAGAGAAGGCTAT	mir-298	Precursor variant
AACACACACACACACACAC	mir-466i	Mature 5' sub variant
GTAAACATCCCCGACTGGAAGC	mir-30d	Mature 5' sub/super
ACTGTAAGGCATTTTCTCAATT	mir-3471-1//mir-3471-2	Precursor variant
ACCCTCTCCGGCGCCGGCCCGCGGGACGCCGCGGCGTCCGTGTGC	mir-712	Precursor variant
GCCTGCCTCTGCCTCCCGAGTGCTGGGATT	mir-3470a//mir-3470b	Precursor variant
AGGGTTTCTCTGTGTAGCCCTGATT	mir-5098	Precursor variant
TCTTCCTCCTCCTCCTCCTCCTC	mir-1895	Precursor variant
AGCCGTTAAAGGCTAGGCTCACAACCAA	mir-690	Precursor variant
AGCCTTGGATGTCCTGGAACTCACT	mir-3470b	Precursor variant
GTGAGACTGAGTAACTGCTAGATCCTTGGACTTCCATTCACAGC	mir-1194	Precursor variant
AAGAGCACCGACTGCTCTTCCAA	mir-3473f	Precursor variant
ACTAATTGAGAAAATGCCTTACAGCTGGATCTC	mir-3471-1//mir-3471-2	Precursor variant
GTGTGTGTGTGTGTGTGTGTGTGTGTGTGTGTGTTT	mir-466q	Precursor variant
CCTCTGGAAGAGCAGCC	mir-3473f	Precursor variant
CACACACACACACACACACACA	mir-466i	Mature 5' super
TACCCGCTCCGGCGCCGGCCCGCGGGACGCCGCGGCGTCCGTG	mir-712	Precursor
GGTGGCGCATGCCTT	mir-1946a	Precursor
ACTGAGCCATCTCTCCAGCCCCC	mir-3473c//mir-3473f	Precursor variant
CGCTCCGGCGCCGGCCCGCGGGACGCCGCGGCGTCCGTGCGCC	mir-712	Precursor
GTGTGTGTGTGTGTGTGTGCGTGG	mir-466q	Precursor variant
ACGCACACACACACAC	mir-466h//mir-466d	Precursor
TCCCTGAGACCCTAACTTGTGAA	mir-125b-2//mir-125b-1	Mature 5' super variant
GTTTTTGAGACAGGGTTCCTCTGTGT	mir-5098	Precursor variant
TATTTAGAATGGCACTGATGTGA	mir-465a	Mature 5'
ACCCGATCCGGCGCCGGCCCGCGGGACGCCGCGGCGTCCGTGCGC	mir-712	Precursor variant
ACCAGGGCGGTACCCGCTCCGGCGCCGGCCCGCGGGACGCCGCGG	mir-712	Precursor variant
TCGACGAGGGCCGGTCG	mir-714	Precursor variant
GTGGAGACTGTCATAG	mir-697	Precursor
ACCCGCTCCGGCGCCGACCCGCGGGACGCCGCGGCGTCCGTGCGC	mir-712	Precursor variant
AAAATGTTTAGAGGTGCAGT	mir-1902	Precursor
AACGGAATCCCAAAAGCAGCTG	mir-191	Mature 5' sub
TTTATCATTCCACAAACATTT	mir-421	Precursor variant
CTCCGCTTCTCCTTCACCCCGGCGGTACCCGCTCCGGCGCCGGCC	mir-712	Precursor variant
CTTCTCCTTCACCCGG	mir-712	Precursor
ACTGACTGCTCTTTCAG	mir-3473f	Precursor variant
CTCCGCTTCTCCTTTACCCGGGC	mir-712	Precursor variant
TCACCCGGGCGGTACCCGCTCCGGCGCCGGCCCGCGGG	mir-712	Precursor
AGTGTGTGTGTGTGTGTGTGTGTGTGTGTGTGTG	mir-466q	Precursor variant
AGTCTGTGTATGTATGTATAT	mir-467f	Precursor variant
ACCCGCTCCGGCGCCGGCCCGCGGGACGCCGCGGCGTCCGTGCGT	mir-712	Precursor variant
CTGAGTCGGGAAACACAG	mir-365-2	Precursor variant
TCTCACTGCTGATCATT	mir-6992	Precursor variant
TGGGTCTTGCGCTGGGGGAGGCGGGGTCGACCGCTCGCG	mir-714	Precursor
AGGCAGGTGGATTTCTGAGTTC	mir-3470b	Precursor variant
AGGGATGGGACAGAGGAGGAGAGAGATCCTGTTT	mir-5113	Precursor
GTGTGTGTGTCTGTGTGTGT	mir-466i	Mature 5' sub/super variant
CTGGGACTAAAGGCATGCGCC	mir-3470b	Precursor variant
GAGGCCCTGCGGTGGTTGTCTGTGTGTGTTTGGGTCTTGCGCTGG	mir-714	Precursor variant
TTTTGGGTGATGCTGTGGATGTGTTTGAAGCC	mir-719	Precursor
GTCTGTGTGTGTTTGGGTCTTGCGCTGGGGGAGACGGGGTCGACC	mir-714	Precursor variant
TAGGGTTTCTCTGTGTAGCCCTGGC	mir-5098	Precursor variant
ACAGTTGGATCTCATGGAGGC	mir-3471-1//mir-3471-2	Precursor
TTGTAGACCAGGCTGGCCTCGAACTC	mir-3470b	Precursor variant
GATGCTAGGGACTGAACA	mir-1927	Precursor variant
GCTAGGATTAAAGGCGTGCGCC	mir-8111	Precursor variant
TTTGGGTCTTGCGCTGGGGGAGGCGGGGTCGACCGCTCGCGGGGT	mir-714	Precursor
ACCAGCTCCGGCGCCGGCCCGCGGGACGCCGCGGCGTCCGTGCGC	mir-712	Precursor variant
TGAGGTAGTAGATTGTATAGTTGTGGGGTAGTGATTTTACCCTGT	let-7f-1	Precursor
ATTTTTTTGTGTGTGGCAGTTTTAAGTTATTAGTTTTCAAAATCA	mir-703	Precursor variant
TCACTCTGTAGACCAGGCTGACCTC	mir-3470b	Precursor variant
AGGCTGGCCTTGAAC	mir-3470b	Precursor
GTTTGGGTCTTGCGCTGGGGGAGGCGGGGTCGACCACTCGCGGGG	mir-714	Precursor variant
AAAACTAAACAGGATCTATCATGGTGGCACGGA	mir-546	Precursor
GTGTAGCCTTGGCTGCCCTGGAACTCACTCTGTAGACCAGGCTGG	mir-3470b	Precursor variant
TTTTTGAGACAGGATTTCTC	mir-706	Mature 5' sub variant
AAATTCCTCTAGATAGTCAAGTTCT	mir-3535	Precursor
ACTTTTCTGGTGGTGTTTTCAGTTTTC	mir-8091	Precursor
GTTATTAGTTTTCAA	mir-703	Precursor
GATGCTTGACTTGAAGGGAAAACT	mir-684-1	Precursor variant
AGTTCGAGGCCAGCCTGGGCTAC	mir-3470b	Precursor variant
GCCCCAGGGGTCTCTGGGCGAGT	mir-692-2//mir-692-3	Precursor variant
AGTGCTTTTAACCTCTGAGCCATCTCT	mir-3473f	Precursor variant
AACCACTGAGCCATCTCTCCAGCCCCTT	mir-3473f	Precursor
GTCTGTCGCGGTGCCTGAAGCTGTCCCCG	mir-696	Precursor
GTTTTGTTTTGTTCTGTTTT	mir-5098	Precursor variant
AGAAATCCACCTGCCCCTGCC	mir-1946a	Precursor variant
TAAGAGCACTGACTGCTCTTGC	mir-3473f	Precursor variant
GTGTGTGTGTGTGTGTGTTC	mir-466k	Precursor variant
ACACACACACACACACACACACA	mir-466i	Mature 5' super
GCCTCTGCCCCCCAAGTGCTG	mir-709//mir-3470b	Precursor variant
CTCCGCTTCTCCTTCACCCGGGCGGTACCCGCTCCGGCGCTGGCC	mir-712	Precursor variant
ACCCGTAGAACCGACC	mir-99b	Precursor
AAAAAAAAAAAAAAAATTACT	mir-706	Precursor variant
GTTCGAGGCCAGCCTGGTCTACAGAGTGAGTTCCAGGACAGCC	mir-3470b	Precursor variant
GAGGGCTGGTGAGATGGCTCAGT	mir-3473d	Precursor variant
AAGTAGGGATAAATTACTCTTGAAC	mir-684-1//mir-684-2	Precursor
TTTCCCGGGCTTGCTGCTTGCGTGTGCTTGCTGTGGGAAGCTT	mir-696	Precursor variant
TTCCAGAGATAAGATCCAGAGTGCCCGCTGC	mir-680-2	Precursor variant
GCCTCTGCCTCCTGAGTTCTGT	mir-3470a	Precursor variant
TTTAATCCCAGCACTCGGGAGGCAGA	mir-3470b	Precursor variant
TCGACCGCTCGCGGGGTTGGCGCGGTCGCCCGGCGCC	mir-714	Precursor
GTGTGTGTGTGTGTGTGTGTGCGCG	mir-466q	Precursor variant
GTGTTACCGTGAGCCT	mir-3062	Precursor
ATTATGTATGTATGTATGTATGT	mir-297a-1//mir-466i	Precursor variant
AGAGGTATACCGCATGGGAAGA	mir-202	Mature 3' variant
TTTGGGTCTTGCGCTGGGGGAGGCGGGGTCGACCGCTCGCGGGG	mir-714	Precursor
AGAGATGGCTCAACGGTT	mir-3473f	Precursor variant
AGGGCTGGAGAGATGGCTCAGCGGGTAAGAGCACTGACTGCTCTT	mir-3473f	Precursor variant
AGGGTTTCTCTGTATAGCCCTGACTGT	mir-5098	Precursor variant
ACCCGGGCGGTACCCGCTCCGGCGCCGGCCCGCA	mir-712	Precursor variant
TAAGTGCCTGCATGTATATGC	mir-467a-1//mir-467a-2//mir-467a-3//mir-467a-4//mir-467a-5//mir-467a-6//mir-467a-7//mir-467a-8//mir-467a-9//mir-467a-10	Mature 5' sub
AAGATCCAGAGTGCCCGCTGCCTGGCG	mir-680-2	Precursor variant
AAACTAGGCTGGCCTTGAACTC	mir-3470b	Precursor variant
GGTCTTGCGCTGGGGGAGGCGGGGTCGACCGCTCGCGGGG	mir-714	Precursor
GACCCCCAAGGCTGTCAAGGAGGATCGATGTTCCAGAGATAAGA	mir-680-2	Precursor variant
GCTATCCCTGTGCTAGTTCCATGT	mir-546	Precursor
TGGGTTTCTTGGGAAGT	mir-6541	Precursor variant
GTAGACGAGGCTGGCCTGGAACT	mir-3470b	Precursor variant
ACCCGGGCGGTGCCCGCTCCGGCGCCGGCCCGCGGGACGCCGCGG	mir-712	Precursor variant
ATGTTCCAGAGATAAGATCCAGAGTGCCCGCTGCCTGGC	mir-680-2	Precursor variant
TCTTTGTTTTGTTTTCC	mir-7092	Precursor variant
CGTCTCCGCTTCTCCTTCACCCGGGCGGTACCCGCTCCGGCGC	mir-712	Precursor variant
AGATCTTCTGGGAAGTT	mir-6371	Precursor variant
GTGTGTGTGTGTGTGTGTGTGTGTGTGTCTGC	mir-466q	Precursor variant
AAGGCTGTCAAGGAGGATC	mir-680-2	Precursor
GCGCTGGGGGAGGCGGGGTCGACTGCTCGCGGGGTTGGCGCGGTC	mir-714	Precursor variant
GTGGACCATTTTTTTGT	mir-703	Precursor variant
AGTGATTAAGAGCACTGACTGCT	mir-3473f	Precursor variant
GTTAAGAGCCCTGGCTGCTCT	mir-3473f	Precursor variant
ACTGTAAAGTGCTGTG	mir-6383	Precursor
GGTTTCTCTGTGTAGCCTTGGCTGTCCTGGAACTCAC	mir-3470b	Precursor variant
GTAGACTAGGCTGGCTTTGAACTC	mir-3470b	Precursor variant
GCTGGGATTAAAGGCGTGTGCC	mir-8111	Precursor variant
TGAGCCGTCTCTCCAGCCTTT	mir-3473b	Mature 3' sub/super variant
TGCAAATCCATGCAAAACTGA	mir-19b-2//mir-19b-1	Mature 3' sub
GTAGCCCTGGCTGTCCTGGAACTC	mir-3470b	Precursor variant
TTTTGAGACAGGGTTTCTCTGTAT	mir-5098	Precursor variant
TTTCCAGCTTCTGGCTATTATAAAT	mir-3472	Precursor
AACAATGCATCGTAAAACCTTCAGAAGGAAAGAATG	mir-703	Precursor variant
ATGAGATCCAACTGTAAGGC	mir-3471-1//mir-3471-2	Precursor
AAGAGCACTGACTGCTCTT	mir-3473f	Precursor
CGGTCGCCCTGCGGTGG	mir-714	Precursor
GTCTCTGTCTCCCCAGTGCTG	mir-709	Precursor variant
AAGCTGCCAGTTGAAGAATTGT	mir-22	Mature 3' variant
AATCCAGGATAGGCT	mir-26a-1//mir-26a-2	Precursor
TAGCAGCAATTCATGTTTTGGAA	mir-322	Mature 5' super variant
GCTCTGTAGACCAGGCTGGCCTTGAAC	mir-3470b	Precursor variant
GTTATTAGTTTTCAAAATCAGT	mir-703	Precursor
GTGGTGCACGCCTTT	mir-8111	Precursor
CCGCGGGACGCCGCG	mir-712	Precursor
GTGTGTGTGTGTGTGTGTTT	mir-466i	Mature 5' sub/super variant
TCGTAAAACCTTCAGAAGGAAAGAATGTTGTGGACCATTTTTTT	mir-703	Precursor variant
TTTTTTTTTTTTTGAGACAGGGTTTCTCTGTGTAGCCCTG	mir-5098	Precursor variant
GTCTCAAAAAAAAAAAA	mir-706	Precursor variant
GAGTGCTGGGATTAAATTCGT	mir-8111	Precursor variant
GGAGTGTGTGTGTGTGT	mir-669h	Precursor variant
ATTTGGGCCTGGCTGGAGATCAGGTTTGCATACTGTCTTGAGAAC	mir-3063	Precursor variant
ACCTTTTGCTGGAGACAAT	mir-1194	Precursor variant
ATGTGTGTGTGTGTGTGTGTGTGTGTGTA	mir-466i//mir-466q	Precursor variant
GTTTGGGTCTTGCGCTGGGGGAGGCGGGGTAGACCGCTCGCGGGG	mir-714	Precursor variant
GTGTTTGGGTCTTGCGCTGGGGGAGGCGGGTTCGACCGCTCGCG	mir-714	Precursor variant
GGGCTGGAGAGATGGCTCAGCAGTTAAGAGCACTGACTGCTCTT	mir-3473f	Precursor variant
CCAAGGCTGTCGAGGAGGATCAACGTTCCAGAGAT	mir-680-2	Precursor variant
CTCCGCTTCTCCTTCACCCGGGCGGTGCCCGCTCCGGCGCCGGC	mir-712	Precursor variant
CACCCGGGCGGTACCCGCTCCGACGCCGGCCCGCGGGACG	mir-712	Precursor variant
GTGTGTGTTTGGGTCTTGCGCTGGGGGAGGCGGGGTCGA	mir-714	Precursor
TTCTCTGTGTAGCCTTGTCTGTCCTGGAACT	mir-3470b	Precursor variant
TGAGACAGGGTTTCTCTGTGTAGCCCTGGCTGT	mir-5098	Precursor
CTGCTTTCCCGGGCTTGCTGCTTGCGTGTGCTTGCTGTGGGCAG	mir-696	Precursor
TGGTGGCACGGAGTCAGCTAGATGTTGTCTCTTGCTATCCCTGT	mir-546	Precursor
CGTGTGTGTGTGTGTGTGTGT	mir-466i	Mature 5' super variant
CTTTCCCGGGCTTGCTGCTTGCGTGTGCTTGCTGTGGGCAGCTT	mir-696	Precursor
GGTCTTGCGCTGGGGGAGGCGGGGTCGACCGCTCGCGGGGTTGT	mir-714	Precursor variant
GTGTGTGTGTGTGTGTGTGTGTGTTC	mir-466k//mir-466q	Precursor variant
TAGACCAGGCTGGCCTGGCACTC	mir-3470b	Precursor variant
AGCCGGGCAGTGGTGGC	mir-1946a	Precursor
ACAGCCAGGGCTACACAGAG	mir-5098	Precursor
AAAAAAAACAAACAAAC	mir-1192	Precursor variant
GTGCTAGTTCCATGTTTT	mir-546	Precursor
GGGTCTTGCGCTGGGGGAGGCGGGGTCGACCGCTCCCGGGGTTGG	mir-714	Precursor variant
ACCTGCCTCTGCCTCCTGAGTGCTGGGAC	mir-3470b	Precursor variant
AAGGCTGTTAAGGAGGATCGAT	mir-680-2	Precursor variant
AATTTGTGGGCTGGTGAGATGGCT	mir-3473a	Precursor variant
ACATACACACACACACACACACACACACACAC	mir-466q	Precursor
ACTCGGGAGGCAGAGGCAGGTGGATTT	mir-3470b	Precursor variant
GGGTCTTGCGCTGGGGGAGGCGGGGTCGACCGCTCGC	mir-714	Precursor
GGTGTGTGTGTGTGTGTATTT	mir-466i//mir-466q	Precursor variant
GTGTTTGGGTCTTGCGCTGGGGGA	mir-714	Precursor
GTTTGGGTCTTGCGCTGGGG	mir-714	Precursor
AACCAGCGCAGACTGGCGCGCCCCAGGGGTCTCTGGGCGAGTGT	mir-692-2//mir-692-3	Precursor variant
GCCCGCTGCCTGGCGCCTGACTTCGG	mir-680-1//mir-680-2	Precursor variant
CTGGCTGTCCTAGAACTCACTCT	mir-1195	Precursor variant
GTGTGTGTTTGGGTCTTGCGCTGGGGGAGGCGGGGTCTACCGCTC	mir-714	Precursor variant
ATCTCTTTGAGCGCCTCACTC	mir-692-1//mir-692-2//mir-692-3	Mature 3'
AGCTTCTGACTTTCGTTCTTCTGAATTTGCTGAAGCCAGATGCCG	mir-677	Precursor
AGATGGCTCAGTGGGTAAGAGC	mir-3473d//mir-3473f//mir-8115	Precursor variant
GTCTGTGTGTGTTTGGGTCTTGCGCTGGGGGTGGCGGGGTCGACC	mir-714	Precursor variant
ACACACACACACACACACAAAT	mir-466i//mir-1187//mir-466k	Precursor variant
ATGTATGTATGTGTGTGT	mir-466i	Precursor
AAAAACAAAAAAAAAAAC	mir-706	Precursor variant
GTGTGTGTGTGTGTCTGTTTGTGTAGTAT	mir-466q	Precursor variant
AGGAGCAAAGTGATACTG	mir-546	Precursor variant
GTGTGTGTGTGTGTGTATGTGTGTGTGTGTGTGTGTG	mir-466q	Precursor variant
CGGCGCCGGCCCGCGGGACGCCGCGGCATCCGTGCGCCGATGCGA	mir-712	Precursor variant
ACAGGGTTTCTCTGTGTAGCCCTGGTTGTCC	mir-5098	Precursor variant
AATGTACTCTGCCAAGT	mir-3962	Precursor variant
TGTGTGTGTGTGTGTGTGT	mir-466i	Mature 5' sub
GTGTGTGTGTGTGTGTGTGTGTGTGTGTGTGTGTGTGTC	mir-466q	Precursor variant
GACGCCGCGGAGTCCGTGCGCCGATGCGAGTCACCCCCGGGTGTT	mir-712	Precursor variant
ATGTACAAACACACACACACACAC	mir-466k	Precursor variant
AAGCTAGCCTTGAACTCATGGC	mir-1198	Mature 3' variant
AGTGCTCTTAACCACTGAGCTATCT	mir-3473f	Precursor variant
AAACAAGCAAACAAACAGAC	mir-1192	Precursor variant
GGGCTGGCGAGATGGCTCAGT	mir-5128//mir-3473f	Precursor variant
AAATTCACAGAGATCTGACTGCCTCTGCCT	mir-3470a	Precursor variant
AAGAGCACTGACTGCTCCTCCAGAGGTCC	mir-3473f	Precursor variant
ATCCTGACCCCCAAGGCTGTCGAGGAGGATCAATGTTCCAGAGAT	mir-680-2	Precursor variant
ATTTCTGAGTTCGAGGCCAGC	mir-3470b	Precursor variant
ACCCGGGCGGTACCCGCTGCGGCGCCGGCCCGCGGGACGCCGCGG	mir-712	Precursor variant
TTGCATAGTCACAAAAGTGATCATT	mir-153	Precursor
GTGTGTTTGGGTCTTGCGTTGGGGGAGGCGGGGTCGACCGCTCGC	mir-714	Precursor variant
GTTTGGGTCTTGCGCTGGGGAAGGCGGGGTCGACCGCTCGCGGGG	mir-714	Precursor variant
AAAGTATCGCGAAGGCCCACGGCGGGTGTTGACGCGATGTGATTT	mir-6240	Precursor variant
AACTCACCTGCCGAATCAACAAGCCCTGAAAATGGATGGCGCTGA	mir-6236	Precursor variant
AGACCAGGCTGGCCTCGAA	mir-3470b	Precursor variant
ACCCGGGCGGTACCCGCTCCGGCGCCGGCCCGCGGG	mir-712	Precursor
GTGTGTTTGGGTCTTGCGCTTGGGGAGGCGGGGTCGACCGCTCGC	mir-714	Precursor variant
AAAACCTTCAGAAGGAAAGAATGTTGTGGA	mir-703	Precursor
TTTGTAGACCAGGCT	mir-3470a	Precursor
ACCTCTGCAGTCACAGTGAAGTCTGCC	mir-682	Precursor
GTGTATGTGTGTGTGTGTGTGTGTGTGTGTAT	mir-466i	Precursor variant
AAGTGTGTGTGTGTGTGTGTGTGTGTGT	mir-466i//mir-466q	Precursor variant
AAGCACGCCTTTAATCCCAGC	mir-8111	Precursor variant
AATGATAACAATGCATCGTAAAACCTTCAGAAGGAAAGAATGTG	mir-703	Precursor variant
CAGCACCCGGGAGGCAGAGGC	mir-3470b	Precursor variant
ACACACGCACACACACACACA	mir-466i	Mature 5' super variant
GGTTGGGTCTTGCGCTGGGGGAGGCGGGGTCGACCGCT	mir-714	Precursor variant
GGTGTGTGTGTGTGTGTGTGTGTGTGTGTGT	mir-466q	Precursor variant
AGTGATCAAGGGGGAAAGGCCCCTTG	mir-3471-2	Precursor variant
GATGCGAGTCACCCCCGGGTGTTGCGAGTTC	mir-712	Precursor
AGACCAGGCTGGCCTTGAAC	mir-3470b	Precursor
TCTGGCTATTATAAATAAGGTTGC	mir-3472	Precursor variant
AAAGGCTAGGTTCACAACC	mir-690	Precursor variant
GTCTCCGCTTCTCCTTCACCCGGGCGGTACCCGCTCCG	mir-712	Precursor variant
GCTCTGTAGACCAGGCTGGCCTTGAACAC	mir-3470b	Precursor variant
TTGGGTCTTGCGCTGGGGGAGGCGGGGTC	mir-714	Precursor
TCTGCCTGCCTCTGCCTCCAGA	mir-3470a	Precursor variant
AGCACTTGGGAGGCAGAGGCAGGTGAATTTCT	mir-3470b	Precursor variant
TCTCCGCTTCTCCTTCACCCGGGCGGTACCCGCTCCGGCGCC	mir-712	Precursor
TGGGGGAGGCGGGGTCGACCGCTCACGGGGTTGGCGCGGTCGCCC	mir-714	Precursor variant
ACCCGCTCCGGCGCCGGCCCGCGGGACGCCGC	mir-712	Precursor
AAACTCATAGAGATCTGCCTGCC	mir-1195	Precursor variant
GCGGTACCCGCTCCGGCGCCGGCCCGCGGGACGCCGCGGCGTCCG	mir-712	Precursor
GCTAGAGAGATGGCTCAGT	mir-3473f	Precursor variant
GAGATCCAACTGTAAGGC	mir-3471-1//mir-3471-2	Precursor
TGCCTCTTCCTCCTGAG	mir-3470a	Precursor variant
GAGCCCAGCCTGACCCCCAAGGCTGTCAAGGAGGATCGATGATCC	mir-680-2	Precursor variant
GTGTGTTTGGGTCTTGCGCTGGGGGAGGCGGGGTCAACCGCTCGC	mir-714	Precursor variant
AGTGGTTAAGAGCACTGACTGCTCTTCT	mir-3473f	Precursor variant
AGGGGTCTCTGGGCGAGTATCTCTTTGAGCGCCTCACTCTCAAGC	mir-692-2//mir-692-3	Precursor variant
GGGTCTTGCGCTGGGGGAGGCGGGGTCGATCGCTCGCGGGGTTGG	mir-714	Precursor variant
GCTCCGGCGCCGGGCCGCGGGACGCCGCGGCGTCCGTGCGCCGAT	mir-712	Precursor variant
CTCCGCTTCTCCTCCACCCGGGCGGT	mir-712	Precursor variant
GCGCTGGGGGAGGCGGGGTCGACCGCTCGCGGGGTTGGCGCG	mir-714	Precursor
CCGCGGCGTCCGTCCGCCGATGCGAGTCACCCCCGGGTGTTGCGA	mir-712	Precursor variant
GATTCAGATGGGCAGATTGGGAAGTAGTC	mir-7670	Precursor variant
GTCTCCGCTTCTCATTCACCCGGGCGGTACCCGCTCCGGCGCCGG	mir-712	Precursor variant
AGTGAATGGAAGTCCAAGGATCT	mir-1194	Precursor variant
GTTTGGGTCTTGCCCTGGGGGAGGCGGGGTCGACCGCTCGCGGGG	mir-714	Precursor variant
CCAGAGTGCCCGCTGCCTGGCACCTGACTTCGGCCCCCATGTCA	mir-680-2	Precursor variant
ACCCGGGCGGTACACGCTCCGGCGCCGGCCCGCGGGACGCCGCGG	mir-712	Precursor variant
GTTCTTAACTGCTGAGCCATC	mir-3473f//mir-8115	Precursor variant
GGCCGGTCGGTCGCCCTGCGGTGGTTGTCTGTGTGTGTTTG	mir-714	Precursor
ATTCGGCTCTGGGTC	mir-760	Precursor
GTGATTGGGTATTGCGCTGGGGGAGGCGGGGTCGACCGCTCGCGG	mir-714	Precursor variant
AAATGCTAGGCTCACAACCAAAA	mir-690	Mature 3' super variant
GTGTGTGTGTGTGTAAGTGT	mir-466q	Precursor variant
GGGTCTTGCGCTGGAGGAGGCGGGGTCGACCGCTCGCGGGGTTGG	mir-714	Precursor variant
AACTAGCCCTGAAAGTGGATGGCGCTGC	mir-6236	Precursor variant
GCGCTGGGGGAGGCCGGGTCGACCGCTCGCGGGGTTGGCGCGGTC	mir-714	Precursor variant
AGTTAAGAGCATTGACTGCTCTTCCA	mir-3473f	Precursor variant
GTGTGTGTGTGTGTATGTGTGTGTGCATGT	mir-466q	Precursor variant
GAGACAGGGTTTCTCTGTGTAGCCCTGACTGTCC	mir-5098	Precursor variant
AGACTAGGCTGGCCTGAAATTC	mir-3470a	Precursor variant
AGCATCTACTGCCCT	mir-18a	Precursor
TGGGCTGGTGAGATGGCT	mir-3473a	Precursor
ACCCGCTCCGGCGCCGGC	mir-712	Precursor
GTGTGAGTGTGTGTGTGTGTT	mir-669h	Precursor variant
CAGTGTGTGTTTGGGTCTTGCGCTGGGGGAGGCGGGGTCGACCGC	mir-714	Precursor variant
GTGTGTGTGTGTGTGTGTGTGTGCA	mir-669h//mir-466k//mir-466q	Precursor variant
GTGTTTGGGCCTTGCGCTGGGGGAGGCGGGGTCGACCGCTCGCGG	mir-714	Precursor variant
GCTGGGGGAGGCGGGGTCGACCGCTCGCGGGGTTGG	mir-714	Precursor
GTAGACCAGGCTGGCCTCAGA	mir-3470a	Precursor variant
TCTGTGTGTGTGTGTGTGTGTGTGTGTGTGT	mir-466q	Precursor variant
TGTGTGTTTGGGTCTTGCGCTGGGGG	mir-714	Precursor
GTAGTGTTTCCTACTTTATGG	mir-142b	Mature 5' sub/super
GTGTTTGGGTCTTGCGCTTGGGGAGGCGGGGTCGACCGCTCGCGG	mir-714	Precursor variant
ACTGAGCCATCTCTCCAGCCCCTG	mir-3473f	Precursor variant
AAAGCCAGCCAGGGCTAGATAGTGAG	mir-1191a	Precursor variant
ATGTAGACCAGGCTGGCCTTGAAC	mir-3470b	Precursor variant
AATGTTCCAGAGATAAGATCCAGAGTGCCCGCTGCCTGGCG	mir-680-2	Precursor variant
ATTGGAAGAAGGGAGTCTAGCTCTTGCTCC	mir-1194	Precursor
TGTTTGTTTGTTTGT	mir-1192//mir-1954	Precursor
AGTGGGTAAGAGCACTGACTGCTCT	mir-3473f	Precursor variant
ACCTGGGCCTGACCTGG	mir-8117	Precursor variant
ACCCGGGCGGTACCCGCTCCGGCGCCGGCCCGCGGGACGCC	mir-712	Precursor
ACCCGGGCGGTATCCGCTCCGGCGCCGGCCCGCGGGACGCCGCGG	mir-712	Precursor variant
ACATAGTGAGTTCCAGGACAGCC	mir-3470b	Precursor variant
GGTACCCGCTCCGGCGCCGGCCCGCGGGACGCCGCGGTGTCCGTG	mir-712	Precursor variant
CAGCCTGACCCCCAAGGCTGTCAAGGAGGATCAATGTTCCAGA	mir-680-2	Precursor
ACACACACACACACACACACACACACACACACACACCC	mir-466q	Precursor variant
GCTAGAGAGATGGCTCAGTGGTT	mir-3473f	Precursor variant
GTCCGTGCGCCGATGCG	mir-712	Precursor
GAGTTTGAGGCCAGCCTGGTCTA	mir-3470a//mir-3470b	Precursor variant
TGGTTGTCTGTGTGTGTTTGGGTCTTGCGCTGGGGGAGGCGGGGT	mir-714	Precursor
GAGAAAATGCCTTACAGTTAGATCTCATGGAGGC	mir-3471-1//mir-3471-2	Precursor variant
AAGTGCCTGCATGTATATGCG	mir-467a-1//mir-467a-2//mir-467a-3//mir-467a-4//mir-467a-5//mir-467a-6//mir-467a-7//mir-467a-8//mir-467a-9//mir-467a-10	Mature 5' sub
AATCCCAGCACTGGGGAGGCAGAGGC	mir-3470b	Precursor variant
TACCTCCAAAAAGAAGC	mir-3471-1	Precursor variant
ATTTTTTTGTGTGTGGCAGTTTT	mir-703	Precursor variant
ATGTGTGTGTGTGTGTATGTATGTGTGTG	mir-466j//mir-466q	Precursor variant
TAAGATCCAGAGTGCCCGCTGCCTGGCGCCTGACTTCGGCCCCCA	mir-680-2	Precursor variant
ATGTAGACCAGGCTGGC	mir-1191a//mir-3470a//mir-3470b	Precursor variant
CTCCTTCACCCGGGCGGTACCCGCTCCGGCGCCGGCCCGCG	mir-712	Precursor
GGGTCTTGCGCTGGGGGAGGCGGGGTCGACCGCTCGCGGGGT	mir-714	Precursor
AGATGGGGTTTCTCTGTGT	mir-1954	Precursor variant
AACACACACACACACACACACACA	mir-466i	Mature 5' super variant
ATGTAGACCAGGCTGGCCTTAAACTC	mir-3470a//mir-3470b	Precursor variant
GTGTGTTTGGGTCTTGCACTGGGGGAGGCGGGGTCGACCGCTCGC	mir-714	Precursor variant
GTGTGTGTGTGTGTGTTAAAT	mir-1187	Precursor variant
TTGCGCTGGGGGAGGCGGGGTCGACCGCTCGCGGGTTTGGCGCGG	mir-714	Precursor variant
ATGTGTGTGTGTGTGTGTGTGTGTGTGTGTGTGT	mir-466q	Precursor variant
ACCCCGGCGGTACCCGCTCCGGCGCCGGCCCGCGGGACGCCGCGG	mir-712	Precursor variant
ATGCCTGTGTGTGTGTGTGTGTGTGTGT	mir-466i//mir-669h	Precursor variant
GCGCTGGGGGAGGCGGGGTCGACCGCTCGCGGGGTT	mir-714	Precursor
CCTGGCTGTCCTGGAACTCACTCTGTAGACCAGGCTGGCCTT	mir-3470b	Precursor variant
ACTCGGGAGGCAGAGGCAGGC	mir-3470a//mir-3470b	Precursor variant
AGACACACACACACACACACACACACACACACACACA	mir-466q	Precursor variant
AATAGCCAGAAGATGGAAAGAAC	mir-3472	Mature 3' sub variant
GTGTGTCTGGGTCTTGCGCTGGGGGAGGCGGGGTCGACCGCTCGC	mir-714	Precursor variant
CAGCAGCAATTCATGTTTTGGAA	mir-322	Mature 5' super variant
ACAAACACACACACACACACACACACACACA	mir-466q	Precursor variant
CCCAAGGCCGTCAAGGAGGATCGATGTTCCAGAGATAAGATCCAG	mir-680-2	Precursor variant
ACACACACACACACACACACACACG	mir-466q	Precursor variant
AGGCTGGAAACCTCTGC	mir-1929	Precursor variant
GTGTGTGTGTGTGTGTGTGTGTCT	mir-466i//mir-466q	Precursor variant
GCGCCGATGCGAGTCACCCCCGGGTGTTGCGAGTTCGGGGAG	mir-712	Precursor variant
TGAGTTCGAGGCCAGCCTGGTCTACAGAGTGAGTTCCAGGACAG	mir-3470b	Precursor variant
AAGATCCAGAGTGCCCGCTGCCTGGCGCCTGACTTCAGCCCCCA	mir-680-2	Precursor variant
GGTGTGCAAAACTCCGTACATTGCTATTTTGCCACACTGCAACAC	mir-3064	Precursor
AGTGGCCGGTGGGGCCTGGACCTACAACACCACCTCTGC	mir-682	Precursor variant
GGCTGGAGAGATGGCTCAGTGGGTAAGA	mir-3473d	Precursor variant
GAGTGTGTGTGCATGGGTGTGT	mir-669e	Precursor variant
GGGGTTGGAGAGATGGC	mir-3473c//mir-3473f	Precursor variant
TTGCGCTGGGGGAGGCGG	mir-714	Precursor
TCTGTGTAGCCCTGGCTG	mir-5098	Precursor
GCTTAGAAGTCTGCCCCT	mir-7035	Precursor variant
ACCCGGGAGGCAGAGGCAGGC	mir-3470a//mir-3470b	Precursor variant
CCGGCCCGCGGGACGCCGCGGCGTCCGTGCGC	mir-712	Precursor
AAATGGCTCAGCGGTTAAGAGCAC	mir-3473f	Precursor variant
AAGAGCACTGACTGCGCTTCC	mir-3473f	Precursor variant
ATGTGTGTGTGTGTGTGTGTGTGTGTGTG	mir-466i//mir-466q	Precursor variant
AGACCAGGCTGGCCTCAAACTC	mir-3470a//mir-3470b	Precursor variant
GGCGCGGTCGCCCGGCG	mir-714	Precursor
GGGCTGGAGAGATGGCTCAGCGGTTAAGAGCACTG	mir-3473f	Precursor variant
CCCTGCGGTGGTTGTCT	mir-714	Precursor
ATGGTTTCTCTGGGTAGCCCTGGCTGT	mir-5098	Precursor variant
ACTTGGGAGGCAGAGGCAGG	mir-709//mir-3470b	Precursor variant
AAACTAAACAGGATCTATCATGGTGG	mir-546	Precursor
AGAGATGGCTCAGTGGTTAAGAGCACT	mir-3473f	Precursor variant
GATTCAGATGGGCAGATTGGGAAGTAGTCTTTGCACATG	mir-7670	Precursor variant
AAAAAAAAAACAGGTCAG	mir-351	Precursor variant
ACCTCTTTAGACAAGAT	mir-202	Precursor variant
CCTAGCCTGACCCCCAAGGCTGTC	mir-680-2	Precursor variant
ACTAATTGAGAAAATGCCTTGCAGT	mir-3471-1//mir-3471-2	Precursor variant
GACTGCTCTTCCAAAGG	mir-3473f	Precursor variant
GGGGCTGGAGAGATGGCTCAGTGG	mir-3473f	Precursor
CCGTCTGAGCTTGGCTG	mir-127	Precursor
AGTCCCAGCACTCGGGAGGCAGAGGCAGGTGGATTT	mir-3470b	Precursor variant
ACCCGGGCGGTACCCGCTCCGGCGCCGGCCCGCGGGACG	mir-712	Precursor
ACCCGCTTCGGCGCCGGCCCGCGGGACGCCGCGGCGTCCGTGCG	mir-712	Precursor variant
GGGTCTTGCGCTGGGGGAGGCGGGGTCGACCG	mir-714	Precursor
TGTGTAGCCCTGGCTA	mir-1954	Precursor
GTCCCCGAGCCACGCTTCCTGCTTTCCCGGGCTTGCTG	mir-696	Precursor
TAATTGAGAAAATGCCTGACAG	mir-3471-1//mir-3471-2	Precursor variant
GTGTGTGTTTGGGTCTTGCGCTGGGG	mir-714	Precursor
GGCTGTCTTGGAACTCACTCTGT	mir-3470b	Precursor variant
GGGGCTGAAGAGATGGCTCAGTGGTT	mir-3473f	Precursor variant
TTGGCCCCCTTCAACCAGCTGT	mir-133a-1//mir-133a-2	Mature 3' sub/super variant
GTTTGGGTCTTGCGCTGGGGGAGGCG	mir-714	Precursor
AGGTAAGAGCACTGACTGCTCTTC	mir-3473f	Precursor variant
GAGCCATCTCTCCAGCCCGAGC	mir-3473b	Precursor variant
ACTCGGGAGGCAGAGGCAGGTGGATTTCTGAGTT	mir-3470b	Precursor variant
GTTTGGGTCTTGCGCTGGGGGAGGCGGGGTCGACCG	mir-714	Precursor
ACTTTGTAGACCAGGCTGGCCTTGAACTC	mir-3470b	Precursor variant
TGTTTGGGTCTTGCGCTGGGG	mir-714	Precursor
GTGTGTGTGTGTGTGTGTGCGC	mir-466i	Mature 5' super variant
ACGTGTGTGTGTGTGTGTGTGTGTGTGT	mir-466i//mir-466q	Precursor variant
GTGTGTGTGTGTGTGTGTGTGTGTGTGTGTGTGTG	mir-466q	Precursor variant
GTTTGGGTCTTGCGCTGGAGGAGGCGGGGTCGACCGCTCGCGGGG	mir-714	Precursor variant
CACCCGGGCGGTACCCGCTCCGGCGCCGGCCCGCGGGA	mir-712	Precursor
GCCCTGCTCCTGCTGGCC	mir-7085	Precursor variant
AGAAGGAAAGAATGTTGTAGACCATTTTTT	mir-703	Precursor variant
GTTTGGGTCTTGCGCTGGAGAAGGCGGGGTCGACCGCTCGCGGGG	mir-714	Precursor variant
ACCCGCTCCGGCGCCGGCC	mir-712	Precursor
AGACTGGCGCGCCCCAGGGGACTCTGGGCGAGT	mir-692-2//mir-692-3	Precursor variant
GACAGGGTTTCTCTGTGTAGCCCTGACTGTC	mir-5098	Precursor variant
GTTTACGTGTGTGTGTGTGT	mir-669c	Precursor variant
GTTTTGTTTTGTTTTTGTGACAGGGTTTCTCTGTGTAACCCTGGC	mir-5098	Precursor variant
ACACACACACACATAC	mir-466i	Precursor
AGGTGGATTTCTGAGTTCAAGGCCAGCCTGGTCT	mir-3470b	Precursor variant
GTGTGTGTGTGTGTGTGTGTGTGTGAGT	mir-466q	Precursor variant
GTGTGTGTGTGTGTGTGTGTATGTATGT	mir-466q	Precursor variant
GAGACAGGGTTTCTCTGTGT	mir-1195//mir-5098	Precursor
AGACCAGGCTGGCATTGAACT	mir-3470b	Precursor variant
AGGGATTAAAGGCGTGCGCCAACACT	mir-1946b	Precursor variant
CTATTTATGCAAAAT	mir-450a-1	Precursor
ACTCTTGGGCTGGAGAGATGGCTCAGC	mir-3473b	Precursor variant
AGATCAGGCTGGCCTCGAACTC	mir-1195	Mature 5' sub variant
TCACCCCCGGGTGTTGCGAGT	mir-712	Precursor
GGGCCGGTCGGTCGCCCTGCGGTGGTTGTGTGT	mir-714	Precursor variant
GAGTTCAAGGCCAGCCTT	mir-3470b	Precursor variant
GTTTGGGTCTTGCGCTGGGGGAGGCGGGGCCGACCGCTCGCGGGG	mir-714	Precursor variant
TAGTAGATTGTATAGTTGTGGGGTAGTGATTTTACCCTGT	let-7f-1	Precursor
GCGTGTGTGTGTGTGTGTGTGTGT	mir-466q	Precursor variant
CTGTGTAGCCCTGGCTGACTT	mir-1191a	Precursor variant
ACCCGCTCCGGCGCCGGCCCGCGGGACGCCGCGGCGTCCGTGCCC	mir-712	Precursor variant
CACGCACACACACACACACACACAC	mir-466q	Precursor variant
GAGGCCAGCCGGGTCTACAGAGT	mir-3470b	Precursor variant
GTAGGGCAAGCTGTCTTTAAGTAGG	mir-684-1//mir-684-2	Precursor variant
AACACTGTCTCAAAAAAC	mir-706	Precursor variant
ACTCTGTAGACCAGGCTGACCTT	mir-3470b	Precursor variant
GTGGCCGGTGGGGCCTGGACCTACAACACCACCTCTGC	mir-682	Precursor variant
TGGGTCTTGCGCTGGGGGAGGTGGGGTCGACCGCTCGCGGGG	mir-714	Precursor variant
CTTGCTGCGTGAGACTGAGTAACTGCTAGA	mir-1194	Precursor variant
AAACAAACAAACAAAC	mir-1192//mir-1954	Precursor
GGGAGGCAGAGGCAGGTGGATTTCT	mir-1946a//mir-3470b	Precursor variant
TTTGGCAATGGTAGAACTCAC	mir-182	Precursor
GACAGGGTTTCTCTGTGTAGCCCTGACTGTCC	mir-5098	Precursor variant
ACCCGCTCCGGCGCCGGCCCGCGGGACGCCGCGGCGTC	mir-712	Precursor
ACACACACACACACACACACACATACACACACACAC	mir-466q	Precursor variant
AGAGAAACCCTGTCT	mir-706//mir-1195//mir-5098	Precursor
GAGTTCAAGGCCAGCCTGGTCTACAGAGT	mir-3470b	Precursor
ACCCGGGCGGTACCCGCTTCGG	mir-712	Precursor variant
ATCTCTTTGAGCGCCTCACTCTCAAGCACG	mir-692-2//mir-692-3	Precursor
AATTCATTCCGTTACTTTTCTGGTG	mir-8091	Precursor
AGCCTGGTCTACAAAGTGAGTTCC	mir-3470a//mir-3470b	Precursor variant
GCCTCTGCCTCCTGAGAGCTGGGATT	mir-3470a	Precursor variant
CTGTGTGTGTTTGGGTCTTGCGCTGGGGGAGGCGGG	mir-714	Precursor
GTGTTTGGGTCTTGCGCTGGGGGAGGCGGGGTCGACCTCTCGCGG	mir-714	Precursor variant
CGGCCGCCCCGCGGTGGTTGTCTGTGTGTGTTTGGGTCTTGCGCT	mir-714	Precursor variant
GTGTGTGTGTGTGTGTGTGTGTGTGCG	mir-466q	Precursor variant
AGACCAGGCTGACCTTGA	mir-3470b	Precursor variant
GCTGGGATTAAAGGTGTGTGCC	mir-1946a	Precursor variant
CGCCGCGGCGTCCGTGCGCCGATGCG	mir-712	Precursor
ACAGAGAAACCCTGTCTCAAAAAAAAAAAA	mir-5098	Precursor variant
ACTTTGTAGACCAGGCTGGCCTTGAACTCAGA	mir-3470b	Precursor variant
CAGTGCAATGTTAAAAGGGCAT	mir-130a	Mature 3'
AGCACCCTGGAGGCAGAGGCAGG	mir-3470a//mir-3470b	Precursor variant
GTAAGGCATTTTCTCAATT	mir-3471-1//mir-3471-2	Precursor variant
GCACTCGGGAGGCAGAG	mir-3470b	Precursor
AAAACCTTCAGAAGGAAAGAATGTTGTGGACCAT	mir-703	Precursor
CGGGACGCCGCGGCGTCCGTGCG	mir-712	Precursor
GTGTGTGGCAGTTTTAAGTTATTAGTTTTCAAAAT	mir-703	Precursor
ACTGCCTCTGCCTCCCGAGTGCTGGG	mir-3470b	Precursor variant
TGAACACAACGACTTCAAACCACCTGATTCATGGCAGTTACTGCT	mir-196a-1	Precursor variant
CGACCGCTCGCGGGGTTGGCGCG	mir-714	Precursor
GTTTACGTGTGTGTGTGT	mir-669c	Precursor variant
GGTCGCCCTGCGGTGGTTGTCTGTGT	mir-714	Precursor
GGTGTGTGTGTGTGTGTGTGTGTGTGTGT	mir-466q	Precursor variant
GGAGGCAGAGGCAGGTGGATTTCT	mir-1946a//mir-3470b	Precursor variant
AGACTATGAGAGTCTCC	mir-697	Precursor variant
GTGTGTTTGGGTCTTGCGCTGGGGGAGGCGGGGTCGACTGCTCGC	mir-714	Precursor variant
TGTGTGTGTGTGTGTGTGTGTGTGTGT	mir-466q	Precursor
AGCCTAGCCTGACCCCCAAGGCTGTCAAGGAGGATC	mir-680-2	Precursor variant
CTCCTTCACCCGGGCGGTACCCTCTCCGGCGCCGGCCCGCGGGAC	mir-712	Precursor variant
GTTCCAGAGATAAGATCCAGAGTGCCCGCTGCCTGGC	mir-680-2	Precursor variant
GCTGGCATTAAAGGCGT	mir-8111	Precursor variant
GTGTGTGTGTCTGTGTGTGTGT	mir-466i	Mature 5' super variant
AGATCCAGAGTGCCCGCTGCCTGGCGCCT	mir-680-2	Precursor variant
ATCATGGTGGCACGGAGTCAGCTAGATGTTGTCTCTTGCTATCC	mir-546	Precursor
GGGGCCTGGACCTACAACACCACCTCTGCAGTCACAGTGAAGTCT	mir-682	Precursor
TGGCCGGTGGGGCCTGGACCTACAACACCACCTCTGCAGTCAC	mir-682	Precursor variant
AAAAGCATGTGCCAGCAC	mir-1946b	Precursor variant
GCGCTGGGGGAGGCGGGGTCGACCGCTCGCGGGGTTGG	mir-714	Precursor
ACTCTGTAGACCAGGCCGGCCTTGAACTCAC	mir-3470b	Precursor variant
GGCACTGTGGTTCCTGCATGAAAAC	mir-682	Precursor
CAGGGTTTCTCTGTGT	mir-1195//mir-5098	Precursor
AAGGCCAGTCTGGTCTACAGAGTGAGTTC	mir-3470b	Precursor variant
AGAAATCCACCTGCCTCTGCCTCCCAA	mir-1946a	Precursor variant
TCGAGGCCAGCCTGGTCTAC	mir-3470b	Precursor variant
ACCCGGGCGGTACCTGCTCCGGCGCCGGCCCGCGGGACGCCGCGG	mir-712	Precursor variant
CACACACACACACACATACACACACACACA	mir-466q	Precursor variant
AAGACAGGGTTTCTCTGTGT	mir-1195//mir-5098	Precursor variant
TCGGTCGCCCTGCGG	mir-714	Precursor
AGGTCTGAGCAGATC	mir-3097	Precursor
CGCCCTGTGGTGGTTGTCTGTGT	mir-714	Precursor variant
CTCCGCTTCTCCTTCACCCGGGCGGTACCCGCTCCGGCGCC	mir-712	Precursor
ACTGGAACATTGTCCTC	mir-3063	Precursor variant
AGAAGGAAAGAATGTTGTGGACCATTTTTT	mir-703	Precursor
TGAGGTAGTAGTTTGTGCTGTTT	let-7i	Mature 5' super variant
CGACGAGGGCCGGTCGGTCGCCCTGCGGT	mir-714	Precursor
AGGGCTGGAGAGATGGCTCAGCGGTTAAGAGCACTGACTGCTCTT	mir-3473f	Precursor variant
TTGGGTGGGACCATCTCTGGGCTGGTAGTCTT	mir-3471-2	Precursor variant
GACAGGGTTTCTCTGGGTAGC	mir-5098	Precursor variant
ACTGGCGCGCCCCAGGGGTCTCTGGGCGAGTATCTCTTTGAGC	mir-692-2//mir-692-3	Precursor variant
GATAGAAAGTACACTGT	mir-6984	Precursor variant
GTTTAGAGGTGCAGTAGGC	mir-1902	Precursor
GACAGGGTCTCACTGTGTAGCC	mir-5098	Precursor variant
AAAGGCTAGGCTCACATCAAAA	mir-690	Mature 3' variant
AGAGAAACCCTGACTCAAAAAAAAAA	mir-706//mir-5098	Precursor variant
TGTGTGTGTGTGTGTGT	mir-466i	Mature 5' sub
TGGCAGTTTTAAGTT	mir-703	Precursor
GTGCGTGTGTGTGTGTGTGTGTGTGTGTG	mir-466q	Precursor variant
GTTGGGATTAAAGGCGTGCACCATC	mir-8111	Precursor variant
AAGATTCAGAGTGCCCGCTGCCTGGCGCCTGACTTCGGCCCCCAT	mir-680-2	Precursor variant
CGGCATCTGGCACTGTGGTTACTGCATGAAAACAGTGGCCGGTGG	mir-682	Precursor variant
CCTGTGTGTGACAGC	mir-6356	Precursor
GACCGCTCGCGGGGTTGGCGCGGTCGCCCGGCG	mir-714	Precursor
GTGTGTTTGGGTCTTGCGCTGGGGGAGGCGGGGTCGAC	mir-714	Precursor
GCCTGACCCCCAAGGCTGTCAAGGAG	mir-680-2	Precursor
CTCACAGCTCCGGTCCTTGGA	mir-673	Mature 5' sub variant
GCTCTGTAGACCAGGCTGG	mir-3470b	Mature 5' sub variant
GAGAGATGGCTTAGTGGTTAAGAGCACTGACTG	mir-3473f	Precursor variant
AGGCTGGCTTTGAACTC	mir-3470b	Precursor variant
GTGTGTGTGTGTGTGTGTGTGCG	mir-466q	Precursor variant
GGGACGCCGCGGCGTCCGTGCGCCG	mir-712	Precursor
AATCCCAACACTTGGGAGGCAGAGGCAG	mir-1946a	Precursor variant
GAGGGCCGGTCGGTC	mir-714	Precursor
TGGGGGAGGCGGGGTCGACCGC	mir-714	Precursor
GCACTCGGGAGGCAGAGGCAG	mir-3470b	Precursor
ACGCCTATAATCCCAGCACT	mir-8111	Precursor variant
GGAGTTAGGGAGATGGCTC	mir-3473c	Precursor variant
GTTTTTTTGAGACAGGGTTTCTCTGT	mir-1954//mir-5098	Precursor variant
ACACACACACACACACACAAACAC	mir-466q	Precursor variant
GTCTGGCACTGTGGTTCCTGCATGAAAAC	mir-682	Precursor variant
GTGTTTGGGTCTTGCGCTGGGGGAGGCGGGGTCGA	mir-714	Precursor
GGCCGGTCGGTCGCCCTGCGGTGGTTGTCTGC	mir-714	Precursor variant
GTGTGTGTTTGGGTCTTGCGCTGGGGGAGGCGG	mir-714	Precursor
AGGGTTTCTCTGTGTAGTCCTGGC	mir-5098	Precursor variant
GTAGCCCTGGCTGTCCT	mir-1954//mir-3470b	Precursor variant
GTGTGTGTTTGGGTCATGCGCTGGGGGAGGCGGGGTCGACCGCTC	mir-714	Precursor variant
TTGGTCCCCTTCAACCAGCTGT	mir-133a-1//mir-133a-2	Mature 3' sub/super
GCCTGACCCCCAAGGCTGTCAAGGAGGATCAATGTTCCAGAG	mir-680-2	Precursor
GTGTTTGGGTATTGCGCTGGGGGAGGCGGGATCGACCGCTCGCGG	mir-714	Precursor variant
AGTGCACGCCTTTGATCCCAGC	mir-8111	Precursor variant
GTACTGTGATAGCTGA	mir-101b	Precursor
ACTTTGTAGACCAGGCTGG	mir-3470a	Mature 5' sub
ATTTTTTTTGTGTGTGGCAGTT	mir-703	Precursor variant
ATATATATATATATATATATC	mir-467g	Precursor variant
ATTTTTTTGTGTGTGGCAGTTTTAAGTT	mir-703	Precursor variant
GGGTCTTGCGCTGGGGGAGGCGGGGTCGACCGCTCGCGGG	mir-714	Precursor
GTGTGTGTGTGTGTGTATGT	mir-466q	Precursor
ATATATATATACATATAC	mir-466l//mir-467g	Precursor variant
ATTGAGACAGGGTCTCTCTGT	mir-1195//mir-5098	Precursor variant
TTGTGTGTGTGTGTGTGTGTGT	mir-466i	Mature 5' super variant
GTCCTGGAACTCACTCTGTAGACCAGGCTGGCC	mir-3470b	Precursor variant
AATATGCCATGATGTGT	mir-592	Precursor variant
TGTGTGTGTGTGTGTGTGTGTGTG	mir-466q	Precursor
CCTTTACCCGGGCGGTACCCG	mir-712	Mature 5' sub/super variant
TCTGTAGACCAGGCTGGCTTTGAACTC	mir-3470b	Precursor variant
AGAGAAACCCTGTCTCA	mir-706//mir-1195//mir-5098	Precursor
AGCTGTCCTGGAACTCACTCTGTAGACC	mir-3470b	Precursor variant
GCGCTGGGGGAGGCGGGGTCGACCGCTCGCGGGGTTGGCGCGGT	mir-714	Precursor
GTGTGTGTGTGTGTGTGTGTGTGTGTGTGTTGT	mir-466q	Precursor variant
AAGGACGATCGATGTTCCAGAGA	mir-680-2	Precursor variant
CGCCGGCCCGCGGGACGCCGCGGCGTCCGTGC	mir-712	Precursor
GTGTGTGTGTGTCTGTGT	mir-466i	Mature 5' sub variant
ACCTGCCTTCGCCTCCCGAGTGC	mir-3470b	Precursor variant
AGTGTGTGTGTGTGTGTGTGTGTGTGTGTCTGT	mir-466q	Precursor variant
CCCGCTCCGGCGCCGGCCCGCGGG	mir-712	Precursor
TGGAGAGATGGCTCAGCT	mir-690	Precursor
ACCCGCTCTGGCGCCGGCCCGCGGGACGCCGCGGCGTCCGTGCGC	mir-712	Precursor variant
GGGTCTTGCGCTGGGG	mir-714	Precursor
GTGTGTGTGTGTGTGTGTGAC	mir-466i	Mature 5' super variant
GTGTGTGTGTGTGTGTGTGTGTGTGTCTC	mir-466q	Precursor variant
GCCGGGCATGGTGGTGCACGCCTT	mir-8111	Precursor variant
AGGAGGATCAATGTTCCAGAGATAAGATCCAGAGTGCC	mir-680-2	Precursor
GTAGTGGACCATTTTTTTT	mir-703	Precursor variant
AGAAGGAAAGAATGTTGTGGACCAT	mir-703	Precursor
TATCTGTGTGTGTGTGTGTGTGT	mir-466i//mir-1187//mir-466k	Precursor variant
AAAAGCGTGCGCCACCACTG	mir-1946b	Precursor variant
GTGTGTGTGTGTGTGTGTACAGGT	mir-466k	Precursor variant
AACACACACACACACACACACACACACATAC	mir-466i	Precursor variant
GTGTGTGTGTGTGTGTGTAAGTGT	mir-466q	Precursor variant
AAAGGCTAGGCTCACAACTAAAAA	mir-690	Mature 3' super variant
CAAGGAGGATCGATGTTCCAGAGATAAGATCCAGAGTGCCCGCTG	mir-680-2	Precursor variant
GTTTGTTTGTTTGTTTGTTT	mir-1192	Precursor variant
GTGTGTGTGTGTGTGTGTGTGTGTGTGTGTGCG	mir-466q	Precursor variant
AAAGGCTAGGCTCACAACCAAAACT	mir-690	Precursor variant
TACACAGAGAAACCCTGTCTT	mir-5098	Precursor variant
AGACCAGGCTGACCTCGAACTC	mir-3470b	Precursor variant
GTCCTGGAACTCACTCTGTAGACCAGGATGGCCT	mir-3470b	Precursor variant
GGTCGGTCGCCCTGCGGTGGTTGTCTGT	mir-714	Precursor
AGTGCTCCTAACCACTGAGCCATCTCTC	mir-3473f	Precursor variant
GTGAGACAGGGTTTCTCTGTGTAGCCCTGGCTGT	mir-5098	Precursor variant
CTGGCTGTCCTGGAACTCACTCTGTAGACCA	mir-3470b	Precursor variant
AATTCAAAGGAAAAAAAAAAA	mir-7116	Precursor variant
AGCCTAGCCTGACCCCCAAGGCTGTCAAGGAGGATCGATGTTCC	mir-680-2	Precursor variant
TGTGTGTGTGTGTGTGTGTGTGTGTGTGTGTGTGTGT	mir-466q	Precursor variant
AGATCCAGAGTGCCCGCTGCCTGGCGCCTGACTTCGGCC	mir-680-2	Precursor variant
AACTCACTTGCCGAATCAACTAGTCCTGAAAATGGATGGCGCTGG	mir-6236	Precursor variant
AGACCAGGCTAGCCTGGAACTCAA	mir-3470b	Precursor variant
TGTTTGTTTGTTTGTTTGTTTTT	mir-1192	Precursor variant
GACTGGAGAGATGGCTCAGCGGTTAAGAACACTGACTGCTC	mir-3473f	Precursor variant
AAGGAGGATCAATGTTCCAGAGATAAGATCCAGAGTGCCCGCTGT	mir-680-2	Precursor variant
ACGAGGGCCGGTCGGTCGCCCTGCGGTGGTT	mir-714	Precursor
TGTGTGTGTTTGGGTCTTGCGCTGGGGGAGGCGGGGTCGACC	mir-714	Precursor
ATATATATATATATATATGTG	mir-1187	Precursor variant
AAAAAAACAAACAAA	mir-706	Precursor
TGCAAATCCATGCAAAACT	mir-19b-2//mir-19b-1	Mature 3' sub
GCATTTGTGTGTGTGTGTGT	mir-466h	Precursor variant
ATCATGGTGGCACGGAGTCAGCTAGATGTT	mir-546	Precursor
TAGCCTTGGCTGTCCTGGAACTCACTCTGTAGACCAGGCTGGCC	mir-3470b	Precursor variant
GCCGTTCCTGAGAAG	mir-677	Precursor
GTGTGTGTGTGTGTGTGTGTGTATT	mir-466i//mir-466q	Precursor variant
GCATTTGTGTGTGTGTGT	mir-466h	Precursor
TTGAGGCCAGCCTGGTCT	mir-3470a	Precursor variant
GTTTGGGTCTTGCGCTGGGGGAGGCGGGATCGACCGCTCGCGGGG	mir-714	Precursor variant
ATTCTGCCGCTTTTCC	mir-8108	Precursor
ACACACACACACACACATCCCT	mir-466i	Precursor variant
CCGGGCGGTACCCGCTCCGGCGCCGGCCCGCGGGACGCCGCGG	mir-712	Precursor
CGTCTGTGTGTGTGTGTGTGTGTGTGTGT	mir-466q	Precursor variant
GCGTGTGTGTGTGTGTGTTTGTGTGTGT	mir-466q	Precursor variant
TGTTTGGGTCTTGCGCTGGGGGAGGCGG	mir-714	Precursor
AGTGAATGGAAGTCCAAGGATCTAGCAGTTGCTC	mir-1194	Precursor variant
TTCTCCTTCACCCGGGCGGTACCCGCTCCGGCGCCGGC	mir-712	Precursor
GACAGAGTCTCTCTGTGTAGCCCTGGCTGT	mir-5098	Precursor variant
ACACACACACATACACACACACACACACACACACACACA	mir-466q	Precursor variant
ATTTGTGTGTGTGTGTGTGT	mir-466h//mir-466i//mir-1187//mir-466k	Precursor variant
ATATATATGTATATA	mir-467g	Precursor
CAGAGATAAGATCCAGAGTGC	mir-680-2	Precursor
AAAGTGATACTGGGGAG	mir-546	Precursor
CCGGGCGGTACCCGCTCC	mir-712	Precursor
TGTCCTGGAACTCACTCTGTAGACCAGGCTG	mir-3470b	Precursor variant
AGTTTTAAGTTATTAGTTTTCAA	mir-703	Precursor
TAGCCTTGGCTGGCCTGGAACT	mir-3470b	Precursor variant
TTAAGAGCACTGGCTGCTCTTCCAGAGGT	mir-3473f	Precursor variant
TGCCTCCTGAGTGCTGGGACT	mir-3470b	Precursor variant
TTTGGGTCTTGCGCTGGGGGAGGCGGGGTCGACCGCTCGCGG	mir-714	Precursor
GTGTTTGGGTCTTGCGCTGGGGGAGG	mir-714	Precursor
TGAGGTAGTAGATTGTATA	let-7f-1//let-7f-2	Precursor
ATGTAGACCAGGCTGGCTCCT	mir-1191a	Precursor variant
ATCTGCTTAGAGAAC	mir-8097	Precursor
GTGTGTGTGTGTGTGTGTGTGTGAAA	mir-466q	Precursor variant
GTTTGGTTCTTGCGCTGGGGGAGGCGGGGTCGACCGCTCGCGGGG	mir-714	Precursor variant
TTTTTTTTTGAGACAGGGTTTCTCTGT	mir-5098	Precursor variant
ACCCGCTCCGGCGCCGGCCCGCGGGACGCCGCGGCGTCCGT	mir-712	Precursor
GTTCTCTACATTCTGCCGCTTTTCCCCTGAGGCAA	mir-8108	Precursor variant
CACCCGGGCGGTACCCGCTCCGGCGCCGGCCCG	mir-712	Precursor
CGGCCCGCGGGACGCCGCGGCGTCCGTGCGC	mir-712	Precursor
ATATATATATATATATATATATA	mir-467g	Precursor variant
GTGTGTGTGTGTGTGTGTGTGTGTGTT	mir-466q	Precursor variant
ACCCGGGCTGTACCCGCTCCGGCGCCGGCCCGCGGGACGCC	mir-712	Precursor variant
ACTTGGGAGCTACAAGC	mir-6414	Precursor variant
TTTTTTTTTTTTTGGAGACAGGGTTTCTCT	mir-706	Precursor variant
GTGTTTGGGTCTTGCGCTGGGGGAGGCGGGGTCGACCGTTCGCGG	mir-714	Precursor variant
GCCTGGCGCCTGACTTCGGCCCCCATGTCAGC	mir-680-2	Precursor
TGCACATACACACATAC	mir-466q	Mature 3' sub variant
AGTTTTCAAAATCAGT	mir-703	Precursor
CCCAAGGCTGTCGAGGAGGATCAAT	mir-680-2	Precursor variant
AGCTTACAATCTAGCTGG	mir-708	Precursor
ACAGTGAGCTCCTTGAAG	mir-28a	Precursor variant
GTCTGTGTGTGTTTGGGTCTTGCGCTGGGGGAGGCGGGGTCGATC	mir-714	Precursor variant
CTGTGTAGCCCTGGCTGAC	mir-5098	Precursor variant
AGTTAAGAGCACTGACTGCTCTT	mir-3473f	Precursor variant
GGTCACCCCCGGGTGTTGC	mir-712	Precursor variant
AGTGTGTGTGTGTGTGTGTGTGTGT	mir-466q	Precursor variant
GGTCGCCCTGCGGTGGTTGT	mir-714	Precursor
GCTGGGATTAAAGGCGTG	mir-8111	Precursor
AAAGGCGTGCACCACCACTGCCT	mir-1946b	Precursor variant
AGTTGTGTGTGTGTGTGTGTGTGTGT	mir-466k	Precursor variant
GTGTGTGTGTGTATTTGT	mir-466q	Precursor variant
TCCTCTGGAAGAGCAGT	mir-3473f	Precursor variant
TGCTCTTAACTGCTGAACCATCTCTC	mir-3473f	Precursor variant
GCGTGTGTGTGTGTGTGTGTGTGTGTGTGTGT	mir-466q	Precursor variant
GGTTTTTTTGTTTTGTTT	mir-6240	Precursor variant
GGTGGCACATGCCTTTAATCCCAGC	mir-1946b	Precursor variant
ATATATATATGTGTGTATATATATATATAT	mir-467g	Precursor variant
GCACTGAAAATGGATGGCGCTGCAG	mir-6236	Precursor variant
TCCTTGGACTTCCATTCACAGCTGC	mir-1194	Precursor variant
ATCCTCCTGCCTCTGCCT	mir-709	Mature 3' sub/super
TTGAGACAGGGTTTCTCTGTTTAGCTCTGGCT	mir-5098	Precursor variant
GCCTAGCCTGACCCCCAAGGCTGTC	mir-680-2	Precursor variant
TGGGGGCAGGTGAGATGGCTC	mir-3473c	Precursor variant
GTGGTTGCACACGCCTTTAATCC	mir-1946b	Precursor variant
GACCCTCAAGGCTGTCAAGGAGGATCGAT	mir-680-2	Precursor variant
AACTGCTGAGCCATCTCTCCAGCCC	mir-3473c//mir-3473f	Precursor variant
CCTGTAGACCAGGCTGGCCTTGAACTCAGAAAT	mir-3470b	Precursor variant
GTAGGTTGCATAGTT	let-7d	Precursor
TCCGCTTCTCCTTCACCCGGGCGGTACCCGCTCCGGCGC	mir-712	Precursor
GACTGGAGAGATGGCTCAGCGGTTAAGAGCACTGACTGTTCTTCC	mir-3473f	Precursor variant
GGAAGAGCAGTCAGTGCTCTTACCCGCTGAG	mir-3473f	Precursor variant
ACGAGTACCCTACCGCGTGGTGGGACTGGTGGTGGGCCCCAAGGG	mir-1905	Precursor
TATTGCACTTGTCCCGGCCT	mir-92a-2//mir-92a-1	Mature 3' sub
GGGTCTGTCGCGGTGCC	mir-696	Precursor variant
AGCTGTGAATGGAAGTC	mir-1194	Precursor
GCCTCAGCCTCCTGAGT	mir-3470a	Precursor variant
ATTTCTGGAACATTGATCCTCCTTGACAGCCTTGGGGGTCAGGCT	mir-680-2	Precursor variant
TCCTTCCTGTGTTTGCA	mir-700	Precursor variant
GTGTGTGTGTGTGTGTGTGTGTGTGTGTGTGTGTGTGTA	mir-466q	Precursor variant
ATACAAGAGAACTGATCAGTGCTGAAGT	mir-7646	Precursor variant
ACTTGGGAGGCAGAGGC	mir-709//mir-3470b	Precursor variant
GTGTGTTTGGGTCTTGCGCTGGGGGAGGCGGGGTAGACCGCTCGC	mir-714	Precursor variant
CACCCGGGCGGTACCCGCTCCGGCGCCGGCCCGCGGGACGCCGT	mir-712	Precursor variant
GAAGGAAAGAATGTTGTGGAC	mir-703	Precursor
CTGCAAGAGCGGCTGAGTGTGGGGTCTTGCAGTTCCTGTT	mir-5114	Precursor
ACACACACACACTCACTCAC	mir-669h	Precursor variant
AAGGAGGATCAATGTTCCAGAGATAAGATCCAGAGTGCCCGC	mir-680-2	Precursor variant
CGCCGCGGCGCCGGCCCGCGGG	mir-712	Precursor variant
CACCCGGGCGGTACCCGCTCCGGCGCCGGCCCGCGGGACGCCGTG	mir-712	Precursor variant
AAAAAAAAATAAAAAAT	mir-7116	Precursor variant
GTTCCAGAGATAAGATCCAGAGTGCCCGCTGCCTGGCGCCTGAC	mir-680-2	Precursor variant
CGGGAGGCAGAGGCAGGTGGATTTCT	mir-3470b	Precursor variant
AAACGTGTGTGTGTGTGTGTGTGT	mir-466k	Precursor variant
GAGCGCCTCACTCTCAAGCATGACT	mir-692-2//mir-692-3	Precursor variant
ATGTGTGTGTGTGTGTGTGTGTGTGT	mir-466i//mir-466k//mir-466q	Precursor variant
GTTTTTTTTGAGACAGGGTTTCTCTGT	mir-5098	Precursor variant
AAGGCCAGCCTGGTCTAC	mir-3470a//mir-3470b	Precursor
AATGCTCTTAACCACTGAGCC	mir-3473f	Precursor variant
ATATATATATATGTGTGTGTGTGTGTGTGTATAT	mir-1187	Precursor variant
CGACGAGGGCCGGTCGGTCGCCCTGCGGTGGTTGTCTGTGTGTCA	mir-714	Precursor variant
AAAACTAAACAGGATCTATCATGGTGGCACGGAGTC	mir-546	Precursor
ACCCGGGCAGTACCCGCTCCGGCGCCGGCCCGCGGGACGCCGCGG	mir-712	Precursor variant
CTCCGCTTCTCCTTC	mir-712	Precursor
GTGTGTGTGTGTGTGTGTGTGTGTGTGTGTAC	mir-466q	Precursor variant
ACGGGTTGCAGCAGTACTACGTGAAACTGAAGGACAACGAGAAGA	mir-8094	Precursor
GCGTGTGTGTGTGTGTGTGTGTGTGTGT	mir-466q	Precursor variant
AAAACAAACAAACAAAC	mir-1192	Precursor
AGAGGTATACCGCATGG	mir-202	Precursor variant
CATTGCACTTGTCTCGGTCTGAA	mir-25	Mature 3' super variant
CGCGGGACGCCGCGGCGTCCGTGCGCCGATGCGAGTCACCCCCGG	mir-712	Precursor
GCCGTTAAAGGCTAGGCTCACAACCAAAAA	mir-690	Precursor variant
CTGTCAAGGAGGATCAATGTTCCAGAGAT	mir-680-2	Precursor
ACCCGCTCCGGCGCCGGCCCGCGGGACGCCGCGGCGTCCGTCCGC	mir-712	Precursor variant
AGAGGTTAAGAGCACTTACTGCTCTTCCAGAGGTC	mir-3473f	Precursor variant
CTTCCTAAAACTAAACAGGATCTATCATGGTGGCACGGAGTCAGC	mir-546	Precursor variant
AGAATTTGGGGACGGGAGGGAGGATACTTTGA	mir-1892	Precursor
GTGTGTGTGTGTGTGTGTGTCT	mir-466i	Mature 5' super variant
ACCCGCTCCAGCGCCGGCCCGCGGGACGCCGCGGCGTCCGTGCGC	mir-712	Precursor variant
ATTCCTCCTCCTCCTCCTCCTT	mir-1895	Precursor variant
ATACACACACACACACACACACACACACACACACACAC	mir-466q	Precursor variant
GTGTGTGTGTGTGTGTGTGTGTGTAT	mir-466q	Precursor
TGTAAACATCCCCGACTGGAAG	mir-30d	Mature 5'
CTCCGCTTCTCCTTCACCCGGGCGGTACCCGTTCCGGCGCCGGCC	mir-712	Precursor variant
GGGAAGCTGCTTGCCAGCATC	mir-6391	Precursor variant
GTGTTTGGGTCTTGCGCTGGGGGAGGCGGGG	mir-714	Precursor
TTTAAGTTATTAGTTTTC	mir-703	Precursor
GGTCGCCCTGCGGTGGTTGTCTGTGGGTGTTTGGGTCTTGCGCTG	mir-714	Precursor variant
GATTTGTGTGTGTGTGTGTGTGTGTGT	mir-466k	Precursor variant
CGTCTCCGCTTCTCCTTCACCCGGGCGGTACCCGCTCCGGCGCC	mir-712	Precursor variant
AGCTGTGAGTGGAAGTCCAAGGATCT	mir-1194	Precursor variant
AGAGAAGACAACACGAAC	mir-494	Precursor variant
GAGTCACCCCCGGGTGTTG	mir-712	Precursor
AAGTGTGTGTGTGTGTGTGTGTA	mir-466i	Mature 5' super variant
GTGTGCGTGTGTGTGTGTGTGTGTATGTATGT	mir-466q	Precursor variant
ATGTGTATATATATATGTGTGTGTG	mir-467g	Precursor variant
TTTGAGACAGGGTTTCTCT	mir-706//mir-5098	Precursor
AATGCATCGTAAAACCTTCAGAAGGAAAGAATGTTGTGGACC	mir-703	Precursor variant
GTGTATATATATATGTGTGTGTG	mir-1187//mir-467g	Precursor variant
TAATCTGCTTAGAGAACACTAGTGCCAG	mir-8097	Precursor
GAAGGAAAGAATGTTGTGGACCATTT	mir-703	Precursor
ATACACACACACACACACACACACAC	mir-466q	Precursor
GTGTGTGTGTGTGTGCGTGTGTGT	mir-669h//mir-466q	Precursor variant
GCGCTGGGGGAGGCGGGGTCGACCGCTCCCGGGGTTGGCGCGGTC	mir-714	Precursor variant
GTGTTTGGGTCTTGCGCTGGGGGAGGCGGGGTCGACCG	mir-714	Precursor
AAAAAACAAAAAAAAAA	mir-706	Precursor variant
TGGGGGAGGCGGGGTCGACCGCTCG	mir-714	Precursor
TGTGTGTGTGTATACATATAT	mir-466f-2//mir-466f-3//mir-467g	Precursor variant
AAACCATCCTCTGCTAC	mir-6412	Precursor variant
AAAACCTTCAGAAGGAAAGAATGTTGTGTACCATTTTTTTT	mir-703	Precursor variant
GTGTTTGGGTCTTGCGCTGGGG	mir-714	Precursor
GTCTTTAAGTAGGGATAAATT	mir-684-1//mir-684-2	Precursor
TTCACCCGGGCGGTACCCGCCCCGGCGCCGGCCCGCGGGACGCCG	mir-712	Precursor variant
AGACCAGGCTGGCTTTGAACTC	mir-3470b	Precursor variant
ATTTTAGACAAGTGCTC	mir-105	Precursor variant
TCTGTAGACCAGGCTGGTTTTGAACTC	mir-3470b	Precursor variant
ACTCTGTAGACCAGGCTGGCCTGG	mir-3470b	Precursor variant
CTGTGTGTGTTTGGGTCTTGCGCTGGGGGAGGCGGGGTCGACCG	mir-714	Precursor
GATAACAATGCATCGTAAAACCTTC	mir-703	Precursor variant
TCCCTGTCCTTCAGGAGCTCACGAA	mir-339	Mature 5' super variant
GTGAGTGTGTGTGTGTGTGTGTGTGTGTGTA	mir-466q	Precursor variant
AAAGGCGTGCGCCACCAC	mir-1946b	Precursor
GCCTCTGCCTGCCGAGTGCTGGGACT	mir-3470b	Precursor variant
GAACAATGTTCCAGTGAGGAATCCTGATCTCTCGCCCCCAATT	mir-3063	Precursor
AGCCCTGGCTGTCCTGGAACTCACTCTGTAGACCAGGCTG	mir-3470b	Precursor variant
CCGCTCCGGCGCCGGCCCGCGGGACGCCGCGGCGTCCGTGCGCC	mir-712	Precursor
ACTCTGTAGACCAGGCTGGTCT	mir-3470b	Precursor variant
CACTCTGTAGACCAGGCTGGCC	mir-3470b	Mature 5' sub/super
GAGATAACTATACAATCTACTGTCTTTCA	let-7a-1	Precursor variant
ACTCTGTAGACCAGGCTGGCCATGAGCTC	mir-3470b	Precursor variant
GTCTCTAGCTGCATATGT	mir-6369	Precursor variant
TTCTCTGTGTAGCCTTGGCTGT	mir-3470b	Precursor
AATGCCTTTGTAAGAAA	mir-695	Precursor variant
GTGTTTGGGTCTTGC	mir-714	Precursor
GGTCTTGCGCTGGGGGAGGCGGGGTCGACCGCTCGCGGG	mir-714	Precursor
AACTACTGAGCCATCTC	mir-8115	Precursor
AGAGAAACCCTGTCTCAAAA	mir-706	Mature 5' sub
ATGCACACACACACACACACACACACACAC	mir-466q	Precursor variant
TAAAGGGCTCACAACTT	mir-7058	Precursor variant
AACTGGCCCACAAAGTCCCGCT	mir-193b	Mature 3'
CTGGAGAGATGGCTCAGT	mir-3473f	Precursor
AAAAACAAAAAAAAAAAAAAA	mir-706	Precursor variant
GACAGGGTTTTTCTGTGTATCCCTGG	mir-5098	Precursor variant
TTCACCCGGGCGGTACCCGCTCCGGCGCCGGC	mir-712	Precursor
CCCGCTCCGGCGCCGGCCCGCGGGACGCCGCGGCGTCCGTGCGCC	mir-712	Precursor
CTGCCTCTGCCTCCCAAGTGCTGGGATT	mir-3470b	Precursor variant
GGCAGTTTTAAGTTATTAGTTTTCAAAATC	mir-703	Precursor
AAATGTATACACACTTCTATATATGTC	mir-568	Precursor
ACACACACACACACACACACACACACACC	mir-466q	Precursor variant
GTTTTGTTTTGTTTTTGTGACAGGGTTTCTCTGTGTAACCCTGG	mir-5098	Precursor variant
AGATCCAGAGTGCCCGCTGCCTGGCGCCTGACTTC	mir-680-2	Precursor variant
CGTTAAAGGCTAGGCTCACAACCAAAA	mir-690	Precursor variant
TATATATATATATATAT	mir-467g	Precursor variant
GCCTGGCAGTCAGGAGG	mir-9769	Precursor variant
ATACACACACACACACACACACACACTCAT	mir-466i//mir-466q	Precursor variant
AAAAACAAACAAACA	mir-1192	Precursor
CCTAGCCTGACCCCCAAGGCT	mir-680-2	Precursor variant
AAATTACTCTTGAACAAAATGATCCTAGATAGTTTTCCCTTCGTG	mir-684-1//mir-684-2	Precursor variant
ATATGCAACTAGAGACAT	mir-6369	Precursor variant
AGTGCTCTTAACCGCTGAACC	mir-3473f	Precursor variant
GTTTGGGTCTTGCGCTGGG	mir-714	Precursor
AGAGATGGCTCAGCAGTTAAGAGCACT	mir-3473f	Precursor variant
CTCACGCAGCAAGCAGGCGAAGGAGCAAGAGCTAGACTCCCTTCT	mir-1194	Precursor variant
AAGGCTAGGCTCACAACCAAAAAT	mir-690	Precursor variant
AAAGTGTGTGTGTGTGTGTGTGT	mir-466i//mir-466k	Precursor variant
ACACACACATGCACAC	mir-467d	Precursor
TGAGTTCCAGGACAGCCAGGGCTACACAG	mir-3470b	Precursor variant
GGCAGTGTCTTAGCTGGTTGT	mir-34a	Mature 5' sub
AATGAGTGTGGGAAAACCTT	mir-1896	Precursor variant
AGTGTGTGTGTGTGTGT	mir-466i	Mature 5' sub variant
AGTGAGTTCCAGGACAGCCAGG	mir-3470b	Precursor variant
ATTTTTTTTTGTGTGTGGCAGTTTT	mir-703	Precursor
ATGCACATACACACATAC	mir-297a-1//mir-297a-2//mir-297a-3//mir-297a-4	Mature 5' sub variant
GATTCAGATGGGCAGATTGGGAAGTAGTCTTTGC	mir-7670	Precursor variant
AAAGCCAGCCAGGGCTAGATAGTGAGA	mir-1191a	Precursor variant
AATGTGTATATATATATACATAT	mir-467g	Precursor variant
GTGTATATATATATATGTGTGTGTG	mir-467g	Precursor variant
AGAGTGAGTTCTAGGACAGCC	mir-1195//mir-3470b	Precursor variant
CTTGCGCTGGGGGAGGCG	mir-714	Precursor
AGTGTGTGTGTGTGTGTGTGT	mir-466i	Mature 5' super variant
GGCTGGAGAGATGGCTCAGTGGTTAAGAGCACTGACTGCTCTTC	mir-3473f	Precursor variant
GTGTGTGTGTGTCTGTGTGTGTGT	mir-466q	Precursor variant
TGTGTGTTTGGGTCTT	mir-714	Precursor
TGGAGAGATGGCTCAGTGGTTAAGAGCACTGACTGCTCTT	mir-3473f	Precursor variant
TTAGCGGTGGATCACTC	mir-6239	Precursor variant
GTGTGTGTGTGTGTATGTGTGTGTGTGTCTGT	mir-466q	Precursor variant
TGGCTGTCCTGGAACTCGCTC	mir-3470b	Precursor variant
GAATGTGTGTGTGTGTGT	mir-466i	Precursor variant
GTGAGTGTGTGTGTGTGTGTGAGTGT	mir-574	Mature 5' super variant
ATACATACACACACACATATATAT	mir-1187//mir-467g	Precursor variant
AGACCACGCTGGCCTTAAGTTC	mir-3470a	Precursor variant
AATTGAACTTGGGTCCC	mir-5124a	Precursor variant
GTAGCCCAGGCTGGCCTGGAAC	mir-3470b	Precursor variant
CCAAGGCTGTCAAGGAGGATCGATGTTCCAGAGATAAGATCCA	mir-680-2	Precursor variant
AGACCCTGTCTCAAAA	mir-1192	Precursor
GTGTGTGTTTGGGTCTTGCGCTGGGGGTGGCGGGGTCGACCGCTC	mir-714	Precursor variant
CACACACACACACATACACACACACACACACA	mir-466q	Precursor variant
AAAGGCTAGGCTCACAACT	mir-690	Precursor variant
GTGGCGGGGTCGACCGCTCGCGGGGTTGGCGCGGTCGCCCGGCGC	mir-714	Precursor variant
CTATACGGCCTCCTAGCTTTC	let-7e	Mature 3' sub
TTTTTTTTTTTCCTT	mir-7116	Precursor
GTACGTGTGTGTGTGTGTGTGTGTGTG	mir-466i//mir-466q	Precursor variant
GAGAGATGGCTCAGCGGTTAAGAGCACTGACTGCTCTTCC	mir-3473f	Precursor
GTCTGTGGGTGTTTGGGTCTTGCGCTGGGGGAGGCGGGGTCGACC	mir-714	Precursor variant
ACCCGGGCGGTACCCGCCCCGGCGCCGGCTCGCGGGACGCCGCGG	mir-712	Precursor variant
TGTCGCCTTGGCTGTCCT	mir-3470b	Precursor variant
AAAACCTTCAGAAGGAAAGAATGTTGTGGACCATTTTGTGT	mir-703	Precursor variant
GCTGGGGGAGGCGGGGTCGACCGCTCGCGGGGTTGGCGCGG	mir-714	Precursor
ACACACACACACACACACACACACACACACC	mir-466q	Precursor variant
CTAGCCTGACCCCCAAGGCTGTCAAGGAGGATCGA	mir-680-2	Precursor variant
TCCCAGCACTCTGGAGGCAGAGGCAGGTGAATTTCTGAGTT	mir-3470b	Precursor variant
GTTTTCTGAGACATGGTTTCT	mir-706	Mature 5' sub/super variant
ATTGGAAGAAGGGAGTCTAGCTCTTGCTCCTT	mir-1194	Precursor
AAATCGGGCTGGAGAGATGGCTCAGCGGTTAAGAGCACTGACTGC	mir-3473f	Precursor variant
ATATATATATATATATA	mir-467g	Precursor variant
TTGGAGCACTGTGATGTGACA	mir-6355	Precursor variant
GTGTGTGTGTGTGTGTGTGTGTGTGTGTGGT	mir-466q	Precursor variant
GGGTCTTGCGCTGGGGGAGGCGGGGTCGACCGCT	mir-714	Precursor
GTATGTATGTGTGTGT	mir-466i//mir-466j	Precursor
CCCAAGGCTGTCAAGGAGGATCGATGTTCCAGAGATAAGATCCA	mir-680-2	Precursor variant
TGTAAACATCCTCGACTGGAAGCT	mir-30a	Mature 5' super
CTGGTCTACAAAGTGAGTCCTA	mir-3470a	Precursor variant
CTTAACCACTGAGCC	mir-3473d	Precursor
AGGCACGGGAGGACAAGGTTT	mir-6391	Mature 3' sub/super variant
GGTTTTTTTTTTTTTGAAT	mir-181a-2	Precursor variant
TGTCTGTGTGTGTGCGTGTAT	mir-466i//mir-466q	Precursor variant
CTGGGGGAGGCGGGGTCGACCGCTCGCGGGGTTGGCGCGGT	mir-714	Precursor
ATCAGAGACTCTGCTCTC	mir-124-2	Precursor
GACGAGGGCCGGTCGGTCGCCCTGCGGTGGT	mir-714	Precursor
GAGCCTAGCCTGACCCCCAAGGCTGTC	mir-680-2	Precursor variant
CCTGTGCTAGTTCCATGTTTCAGAAGCAAAGTGAT	mir-546	Precursor variant
ATATGTATGTGTGTGTGTGTGTGTGTGTGTGTGT	mir-466i	Precursor variant
ACGAGGGCCGGTCGGTCGCCCTGCGGTGGTTGTGTGT	mir-714	Precursor variant
GTCGCCCTGCGGTGGTTGTCTGT	mir-714	Precursor
GTGTGTGTGTGTGTGTGTGTGTGTGTGTTT	mir-466q	Precursor variant
AACTGCTGGAGACAATATAAGG	mir-1194	Precursor variant
CGACGAGGGCCGGTCGGTCGCCCTGCGGCGGTTGTCTGTGTGTC	mir-714	Precursor variant
GATTAAAGGCATGTGCC	mir-1946b	Precursor variant
TTCCTCCTCCTCCTCCTCCTCCTT	mir-1895	Precursor variant
AACTGGGCAGTGGTGGCTCAC	mir-1946b	Precursor variant
GTGTGTGTGTGTGAGT	mir-574	Precursor
ACCCGCTCCGGCGCCGGCCGGCGGGACGCCGCGGCGTCCGTGCGC	mir-712	Precursor variant
ACCCGCTCCGGCGCCGGCCCGCGGGACGCCGCGGCGTTCGTGCGC	mir-712	Precursor variant
ATATATATATATATATATACATACACA	mir-467g	Precursor variant
CGCTGGGGGAGGCGGGGTCGACCGCTCGCGGGG	mir-714	Precursor
GAGCCATCTCACCAGC	mir-1934//mir-3473a	Precursor
GCTCCTTCGCCTGCTTGCTGCGTGAGACTGAGTAACTGCTAGATC	mir-1194	Precursor variant
ACTCTGTAGACCAGGCTGGTCTCGAACTC	mir-3470b	Precursor variant
TTGGAGAGATGGCTCAGC	mir-3473a	Mature 3' sub/super variant
GAGTTCAAGGCCAGC	mir-3470b	Precursor
CCTCTGCCTCCCGAGTGCTGGGACT	mir-3470b	Precursor
GGCTGTCCTGGAACTCAATCTGTAGACCAGGCTGGCCTTGAACTC	mir-3470b	Precursor variant
AGTCACCCCCGGGGGTTGCGAGTTCGGGGAG	mir-712	Precursor variant
GTAGCCTTGTCTGTCCTGGAA	mir-3470b	Precursor variant
AGAGAAACCCTGTCTCGAAAACAAA	mir-5098	Precursor variant
AGACCAGGCTGGCCTTGAACTCAGAAATTCACCTGCCTCTGCCTC	mir-3470b	Precursor variant
ACACACACACACACACACACACACACACACACACACACA	mir-466q	Precursor variant
GTGTGTGTGTGTGTGTGTGTGTGTGTGTG	mir-466q	Precursor variant
GAGTTCGAGGCCAGCCTGGTCTACAAAGTGAG	mir-3470b	Precursor variant
ACACAGAGAAACCCTGTCTCGGAAACAAA	mir-5098	Precursor variant
GTGTGTGGCAGATTTAAGTTATT	mir-703	Precursor variant
GTTTTTTGAGACAGGGTTTCT	mir-706	Mature 5' sub/super
GTGTGTATGTGTGTGT	mir-466f-1//mir-466f-2//mir-466f-3//mir-466i//mir-466q	Precursor
GTGTGTGTGTGTGTGTGTGTGTGAAT	mir-466q	Precursor variant
ACACCTTTAATCCCAGCAC	mir-8111	Precursor variant
AACTCGTTCACTCAGGGAATCCTGCCCATCGC	mir-1901	Precursor variant
AACCTTTCCCACGCCTTGGCTCTGTGAGAAGGCAGCGTGG	mir-8099-1//mir-8099-2	Precursor variant
CGGCATCTGGCACTGTGGTTCCTGCATGAAA	mir-682	Precursor
AGTAGGTTGTATGGTT	let-7c-1//let-7c-2	Precursor
AAGATCCAGAGTGCCCACTGCCTGGCGCCTGACTTCGGCCCCCAT	mir-680-2	Precursor variant
AGGGCCAGTCGGTCGCCCTGCGGTGGTTGTCT	mir-714	Precursor variant
GTGTGTGCTTGGGTCTTGCGCTGGGGGAGGCGGGGTCGACCGCTC	mir-714	Precursor variant
AAAACTAAACAGGATCTGTCATGGTGGCACGGAGTCAGCTAGATG	mir-546	Precursor variant
GTCTTGCGTTGGGGGAGGCGGGGTCGACCGCTCGCGGGGTTGGCG	mir-714	Precursor variant
GTGTGTGTGTGTGTGTGTGTGCGC	mir-669h//mir-466k//mir-466q	Precursor variant
AGATGTTGTCTCTTGCTATCCCTGTGCTAGTTCCATGTTTTAGAA	mir-546	Precursor
GTCGAGGAGGATCAATGTTCCAGAGATAAGATCCAGAGTGC	mir-680-2	Precursor variant
GAGTGCTGGGATTAAA	mir-8111	Precursor
TGTTTGGGTCTTGCGCTGGGGGAGGCGGGGTC	mir-714	Precursor
GCTGGGATTAAAGGCGTGGGCC	mir-8111	Precursor variant
AAACACACACACACACACACACAC	mir-466i//mir-466q	Precursor variant
TGTGTGTGTGTCTGTGTGTCTGT	mir-466i	Mature 5' super variant
AAAGGCTAGGCTCACAA	mir-690	Precursor
GTGCCGTCCGTCGTTTTCCTCGCTGC	mir-8097	Precursor
TGTGTGTGTGTGTGTGG	mir-466i	Mature 5' sub variant
TCTCTTTGAGCGCCTCACTCTC	mir-692-1//mir-692-2//mir-692-3	Mature 3' sub/super
ACATATGCAGCTAGAGAC	mir-6369	Precursor variant
GCGTTGGGGGAGGCGGGGTCGACCGCTCGCGGGGTTGGCGCGGTC	mir-714	Precursor variant
TGTAGCCCTGGCTGTC	mir-5098	Precursor
GTTTGGGTCTTGCGCTGGGGGAGGCGGGGTTGACCGCTCGC	mir-714	Precursor variant
AAGAGCACTAACTGCGCTTCC	mir-3473f	Precursor variant
AAACACACACACACACACACAC	mir-466i	Mature 5' super variant
CCGCTCCGGCGCCGGCCCGCGGGA	mir-712	Precursor
GTCTCCGCTTCTCCTTCACCCGGGCGGTACCCGCTCCGGC	mir-712	Precursor variant
GTTGTGGACCATTTTTTTTG	mir-703	Precursor variant
ATATATATATATATATATACATACACAC	mir-467g	Precursor variant
ATGTGGTGCTCCGGAGTT	mir-5099	Precursor variant
CGTGTGTGTGTGTGTGTGTGTGTGTGTGTGTGTGTGTGT	mir-466q	Precursor variant
ATATGTGTGTGTGTATATAT	mir-467g	Precursor
GTGTGTGTGTGAGTGTGT	mir-574	Precursor
GGCAGTTTTAAGTTAT	mir-703	Precursor
TGTGAATGGAAGTCCAAGGATCTAGCAGTTACTCAGTCTCAC	mir-1194	Precursor variant
GTGCGCCGATGCGAGTCACCCCCGGGTGTTGCGAGTTCGGGG	mir-712	Precursor
ACACACACACACACACACACACACACACACACA	mir-466q	Precursor variant
GTGTGTGTGTGTGTGTGTGTGTGTG	mir-466q	Precursor
ACACACACACACACACACACACACACACACACACACA	mir-466q	Precursor variant
CTCCGGCGCCGGCCCGCGGG	mir-712	Precursor
GTGTGTGTGTGTGTGCGTGTGT	mir-466i	Mature 5' super variant
CTCGCGGGGATGGCGCGGTCG	mir-714	Precursor variant
CTGGCTGCTCTTCCAGAGGACT	mir-3473f	Precursor variant
CTGCGCTGGGGGAGGCGGGGTCGACCGCTCGC	mir-714	Precursor variant
GTGAGTGTGTGTGTGTGTGTGTGTAAGT	mir-466q	Precursor variant
CACACACACACACAC	mir-466i//mir-1187//mir-669h//mir-466k//mir-466j//mir-466q	Precursor
GTGTGTGTGTGTGTGTGTGTGTGCATGT	mir-669h//mir-466k//mir-466q	Precursor variant
AGCCTTGGCTGCCCTGGAACTCAC	mir-3470b	Precursor variant
GCCCCTGGGCCTATCCTAGAAT	mir-331	Mature 3' super variant
AGTCGCCCTGCGGTGGTTGTCT	mir-714	Precursor variant
CTCTGTGTAGCCCTGGC	mir-1954//mir-5098	Precursor
GTGTGTGTGTGTGTGTGTGTGTGTGTGAGTGT	mir-466q	Precursor variant
GTTTGGGTCTTACGCTGGGGGAGGCGGGGTCGACCGCTCGCGGGG	mir-714	Precursor variant
ACCCGGGCGGTACCCGCTCCGGC	mir-712	Precursor
ACCCGGGCGGTACCCGCTCCGGCGCCGGCCCGCAGGACGCCGCGG	mir-712	Precursor variant
AAGAGCACTGACTGCTCTTCCAGAGGTCCT	mir-3473f	Precursor variant
AAGTATATATATATATATATATAT	mir-467g	Precursor variant
GACCCCCAAGGCTGTCAAGGAG	mir-680-2	Precursor
GAGTGTGTGTGTGTGTGTAA	mir-1187	Precursor variant
ATGCCTTTAATCCCAGCACTTGGGAGGC	mir-3470b	Precursor variant
GCTAAAGAGATGGCTCAGTGGTT	mir-3473f	Precursor variant
TCTCAAAAAACAAACAAAC	mir-706	Precursor variant
CCCAGCCTGACCCCCAAGGCTGTCAAGGAGG	mir-680-2	Precursor
AACTGTAAGGCATCTTCTCAATT	mir-3471-1//mir-3471-2	Precursor variant
GCACACGCCTTTAATCCCAGC	mir-8111	Precursor variant
GGTGCATGCCTTTAATCCCAGC	mir-8111	Precursor variant
TAGATCAGGCTGGCCTGGAACTC	mir-3470b	Precursor variant
AGAGTGCTGGGATTAAA	mir-8111	Precursor variant
AGAGGTGTGTGTGTGTGTGTGTGTGT	mir-466k	Precursor variant
GTTCCAGAGAAAAGATCCAGAGTGCCCGCTGCCTGGCGCCTGACT	mir-680-2	Precursor variant
TGTGTGTGTGCGTGTAT	mir-669c//mir-466i//mir-466q	Precursor variant
TGTGTGTGTGTGTGTGTGTGT	mir-466i	Mature 5' super
ATCCCGGACGAGCCCCCA	mir-5103	Precursor variant
GTGTGTTTGGGTCTTGCGCTGGGGGAGGCGAGGTCGACCGCTCGC	mir-714	Precursor variant
TCATGAGTGCTGGGATT	mir-8111	Precursor
ACTCTCGAGCACGACTAGGAGGCCTCT	mir-692-2//mir-692-3	Precursor variant
TCGGATCCGTCCGAGCTTGGCTG	mir-127	Mature 3' super variant
GTGTGTGTGTGTGTGTGTGTGTGTGTGTGTGAGT	mir-466q	Precursor variant
ACACACACACACACACACACC	mir-466i	Mature 5' super variant
AGGGCTGGAGAGATGGCTCAGCGGTTGAGAGCACTGACTGCTCTT	mir-3473f	Precursor variant
GCGGTACCCGCTCCGGCACCGGCCCGCGGGACGCCGCGGCGTCCG	mir-712	Precursor variant
CTCCGCTTCTCCTTCACCCGGGCGGTACCCGCTCCGGCGCCGGC	mir-712	Precursor
GTGTGTGTGTGTGTGTAAGTGC	mir-466q	Precursor variant
AGAGATAAGATTCAGAGTGCCCGC	mir-680-2	Precursor variant
ACCTGCCTCTGCCTCCCAAGT	mir-3470b	Precursor variant
AACACACACACACACACACACACACAC	mir-466q	Precursor variant
GTTTGGGTCTTGCGCTGGGGGAGGCGTGG	mir-714	Precursor variant
GATTTCTCTGTGTAGCCCAGG	mir-1954//mir-5098	Precursor variant
TCGGTCGCCCTGCGGTGGTTGTCTGT	mir-714	Precursor
ATGGTGCTACTGAGC	mir-8097	Precursor
AATGATAACAATGCATCGTAAAACCTTCAGAAGGAAAGAATGTGG	mir-703	Precursor variant
GTTTGGGTCTTGCGCTGGGGGAGGCGGAGTCGACCGCTCGCGGGG	mir-714	Precursor variant
AAAGCAAAGCACTGAAAAT	mir-6481	Precursor variant
AGCTCAGTGGTAGAGCGC	mir-1928	Precursor variant
TGAGGTAGTAGTTTGTGCTGTTA	let-7i	Mature 5' super variant
AGCCCTGGCTGTCCTGGAACTCACTCTGTAGACCA	mir-3470b	Precursor variant
GAGTAACTGCTAGATCCTTGGACTTCCATTC	mir-1194	Precursor
ACCTTCTGCTGGAGACAATATAA	mir-1194	Precursor
AGTGGAAGAGCACTTGCCT	mir-1928	Precursor variant
GGGCTGGCGAGATGGCTCAGTGGGTAAG	mir-5128	Precursor variant
GTTTGGGTCTTGCGCTGG	mir-714	Precursor
GTGTGTGTGTGTGTGTGTGTGTGTGTAA	mir-466q	Precursor variant
GTGTGTGTGTGTGTGTG	mir-466i	Mature 5' sub
TGGGTCTTGCGCTGGGGG	mir-714	Precursor
AACCCCGCCTGATGCTTTTTGGTTTGTTTCAGGCAGGGTCTT	mir-5116	Precursor
AGCAGCAATTCATGTTTTGG	mir-322	Mature 5' sub
CTGGAGAGATGGCTCAGCCGT	mir-3473a	Mature 3' super variant
CCTGGCGCCTGACTTCGT	mir-680-1//mir-680-2	Precursor variant
ATCCAGGAGTCTGAGGGG	mir-7033	Precursor variant
GCCTGGCGCCTGACTTTAGCC	mir-680-2	Precursor variant
CTCTTCCCAAAACTAAAC	mir-546	Precursor
ATCCGCCTGCCTCTGCCTCCCAAGT	mir-709	Precursor variant
GTGTGTGTGTATGTGTGTC	mir-1187//mir-466q	Precursor variant
TCAGTGCACTACAGAACTTTGT	mir-148a	Mature 3'
GGGTCTTGCGCTGGGGGAGGCGGGGTCGACCGCTCGCGGGGTC	mir-714	Precursor variant
GCTGTCCTGGAACTCACTCTGT	mir-3470b	Precursor variant
TTTAAGTTATTAGTTTTCAAAATC	mir-703	Precursor
TTTTTTTTTTTTTTAAA	mir-290a//mir-7119//mir-290b	Precursor variant
ACACACACACACACACTCATGC	mir-466f-1//mir-466f-2//mir-466i//mir-669e	Precursor variant
GCGCTGGGGGAGGCGGGGTCAACCGCTCGCGGGGATGGCGCGGTC	mir-714	Precursor variant
TTTTGAGACAGGGTCT	mir-1192	Precursor
TCGCCCTGCGGTGGTTGT	mir-714	Precursor
GATAAGATCCAGAGTGCCCGCTGCCTGGCGCCTGACTTCAGCCCC	mir-680-2	Precursor variant
GTCGACGAGGGCCGGTCGGTCGCCCTGCGGTGG	mir-714	Precursor variant
AAAATGTTTAGAGGTGCAGTAGGCATGACTT	mir-1902	Precursor
GTTTGGGTCTTGCGCTGGGGGAGGCGGGGTCAACCGCTCGCGGGG	mir-714	Precursor variant
CAGAGATAAGATCCAGAGTGCCCGCTGCCTGGCGCCTGACTTCAG	mir-680-2	Precursor variant
GGTTGTCTGTGTGTGTTTGGGTCTTGCGCAGGGGGAGGCGGGGTC	mir-714	Precursor variant
AGTGCTCTTAACCGCTGAGCCATCTCACC	mir-3473f	Precursor variant
AAACAGGATCTATCATGGTGGCACGGAGTGAGCT	mir-546	Precursor variant
ACCCGGGCGTTACCCGCTCCGGCGCCGGCCCGCGGGACGCCGCGG	mir-712	Precursor variant
TCTTTGAGCGCCTCACTCTCAAGCACGACAAGGAGGCCTCTGTGT	mir-692-2//mir-692-3	Precursor variant
TGTAAACATCCCCGATTGGAAG	mir-30d	Mature 5' variant
AGTGGCCGGTGGGGCCTGGACCTACAACACTACCTCTGCAGTCAC	mir-682	Precursor variant
GCGGTGGTTGTCTGTG	mir-714	Precursor
AAGGCTGTCAAGGAG	mir-680-2	Precursor
TTCCCCTTCACCCGGGCGGTACCCGCACCGGCGCCGGCCCGCGGG	mir-712	Precursor variant
AATGCATCGTAAAACCTTCAGAAGGAGAGAATGTTGTGGACCATT	mir-703	Precursor variant
CTTGCGCTGGGGGAGGCGGGGTCGACGGCTCGCGGGGTTGGCGCG	mir-714	Precursor variant
GGTCTGTCGCGGTGCCCGAAGCTGTCCCCGAGCCACGCTTCCTGC	mir-696	Precursor variant
ACCCGCTCCGGCGCCGGCCCGCGGGAAGCCGCGGCGTCCGTGCGC	mir-712	Precursor variant
GCGTGTGTGTGTGTGTATGTGTGTGT	mir-466q	Precursor variant
GCTTTCCCGGGCTTGCTGCTTGCGTGCGCTTGCTGTGGGCAGCTT	mir-696	Precursor variant
TGGCCCACAAAGTCTCG	mir-193b	Precursor variant
ATCTCTTTGAGCGCCTTACTCTCAAGC	mir-692-1//mir-692-2//mir-692-3	Precursor variant
GATGGGCCAGCGGTTAAGAGCACTGACTGC	mir-3473f	Precursor variant
GGCGTGTGTGTGTGTGTGTGTGTGTGTGT	mir-574//mir-466q	Precursor variant
GTTTGGGTCTTGCGCTGGGGGAGGCGGGGTCGGCCGCTCGCGGGG	mir-714	Precursor variant
ACCCGGGCGGTACCCGCTCCGGCGCCGGCCCGGGGGACGCCGCGG	mir-712	Precursor variant
GTTTGGGTCTTGCGCTGGGGGAGGCGGGGTAGTCCGCTCGCGGGG	mir-714	Precursor variant
ATAAGGACATTGGAAGAAG	mir-1194	Precursor
GAGAATGTAGTGTTACCGTGAGCCT	mir-3062	Precursor
CGCCCTGCGGTGGTTGT	mir-714	Precursor
GCTTGCTGCGTGAGACTGAGTAACTGCTAGATACTTGGACTTCCA	mir-1194	Precursor variant
ATGGCTGTCCTGGAACTCACTCTGT	mir-3470b	Precursor variant
GTGTGTGTGTGTGTGTGTGTGTGTGTGTGTGTGAGTGT	mir-466q	Precursor variant
AAACCGTTACCATTACTGAGTTT	mir-451a	Mature 5' super
GAGCTAGACAGAGAAACCCTGTCT	mir-5098	Precursor variant
GTGTTTGGGTCTTGCGCTGGGGGAGGCGGGGTCTACCGCTCGCGG	mir-714	Precursor variant
ACCTTTTGCTGGAGACAA	mir-1194	Precursor variant
GTTTGGGTCTTGCGCTGGGGGAGGCGGGGTCGAGCGCTCGCGGGG	mir-714	Precursor variant
GTCTGTGTGTGTTTGGGTCTTGCGCTGAGGGAGGCGGGGACGACC	mir-714	Precursor variant
AAGGCTGTCAAGGAGGATCAATGTTCCAGAGATAAGATCAAGAGT	mir-680-2	Precursor variant
GTGTTTGGGTCTTGCGCTG	mir-714	Precursor
GTTTGGGTCTTGCGCTGGGGGAGGCGGGGTCGACCGCTCTCGGGG	mir-714	Precursor variant
CTCCGCTTCTCCTTCACCCGGGCGGTACCCGCT	mir-712	Precursor
GTTTGGGTCTTGCGCTGGGGGAGGCGGGGTCGACC	mir-714	Precursor
ACCCGGGCGGTACCCGCTTCGGCGCCGGCCCGCGGGACGCCGAGG	mir-712	Precursor variant
GCCAGCCTGGTCTACAGAGTGAGTTCCAGGACAGC	mir-3470b	Precursor variant
ACCTCCCTCTGCCTCCCGAGT	mir-3470b	Precursor variant
GTCCTGGAACTCACTGTGTAGACC	mir-3470b	Precursor variant
TGGCTCAGCCGTTAAAGGCTAGGCTT	mir-690	Precursor variant
CTGGTGAGATGGCTCAGCGGGTAAGAGCACTGACTGCT	mir-3473f	Precursor variant
TGGGGGAGGCGGGGTCGAC	mir-714	Precursor
ATTTTTTTTGTGTGTGGCAGT	mir-703	Precursor variant
GTTCGGGTCTTGCGCTGGGGGAGGCGGGGTCGACCGCTCGCGGGG	mir-714	Precursor variant
TCTTGCGCTGGGGGAGGCGGGGTCGACCGCTCGCGGGGTTGG	mir-714	Precursor
ACAAACCCTGTCTCAAAAAGAAAA	mir-5098	Precursor variant
GAAAGAGCAGTCAGTGCTTTTAACCGCT	mir-3473f	Precursor variant
AAAACCTTCAGAAGGAAAGAATGTTGTGGACCATTTTTTTTGT	mir-703	Precursor variant
GTTTGGGTCTTGCGCTGGGTGAGGCGGGGTCGACCGCTCGC	mir-714	Precursor variant
GTGTGTGTGTGAGTGTGTGTGT	mir-466i	Mature 5' super variant
CTTGCGCGGGGGGAGGCGGGGTCGACCGCTCGCGGGGTTGGCGCG	mir-714	Precursor variant
CAAAGTGGTGTTCGTGCAGGTAG	mir-93	Mature 5' variant
GGTCGCCATGCGGTGGTTGTCT	mir-714	Precursor variant
GAGTTCAAGGCCAGCCTGGTCTATAGAGTGAGTGCCAGGACAGCC	mir-3470b	Precursor variant
GTGTTTGAGTCTTGCGCTGGGGGAGGCGGGGTCGACCGCTCGCGG	mir-714	Precursor variant
GTGTTTGCGTCTTGCGCTGGGGGAGGCGGGGTCGACCGCTCGCGG	mir-714	Precursor variant
GTTTGGGACTTGCGCTGGGGGAGGCGGGGTCGACCGCTCGCGGGG	mir-714	Precursor variant
GCGCTGGAGGAGGCGGGGTCGACCGCTCGCGGGGTTGGCGCGGTC	mir-714	Precursor variant
GTTTGGGTCTTGCGCTGGGGGAGGCGGGGTCGACCGATCGCGGGG	mir-714	Precursor variant
CCTTCACCCGGGCGGTACCCGCTCCGGCGCCGGCCCGCGGGACG	mir-712	Precursor
ACACACACACACACACACACACACACACACACACAC	mir-466q	Precursor variant
ACCCGCTCCGGCGCCGGCCCGCGGGACGCCGCGGCTTCCGTGCGC	mir-712	Precursor variant
TGTAGCCCTAGCTGTCCTAGAACTC	mir-1191a	Precursor variant
CACACACACACACACACACTCA	mir-466i	Mature 5' super variant
GGGTCTTGCGCTGGGGGAGGCGGGGTCGACCGCTCGCGGGGTT	mir-714	Precursor
CTGCCTCTGCCTCCCGAGTGCTGGGATT	mir-3470b	Precursor variant
GCGAGGTCGACCGCTCGCGGGGTTGGCGCGGTCGCCCGGCGCCGC	mir-714	Precursor variant
AAGAGCACTGACTGCTCTTGCAAAGGT	mir-3473f	Precursor variant
GGCTGTCGAGGAGGATCAATGTTCC	mir-680-2	Precursor variant
GCGCCGGCCCGCGGGACGCCGCGGCGTCCGTGCGCCGATGCGAGG	mir-712	Precursor variant
GTGGCTAAGTTCCGC	mir-27a	Precursor
GTGTGGCAGTTTTAGGT	mir-703	Precursor variant
CTGTAAGGCATTCTCTCAATT	mir-3471-1//mir-3471-2	Precursor variant
CTCCCGGGCGGTACACGCTCCGGCGCCGGCCCGCGGGACGCCGCG	mir-712	Precursor variant
CAACTCACCTGCGGAATGAACTAGCCCTGAAAATGGATGGCGC	mir-6236	Precursor variant
GTGTTTGGGTCTTGCGCAGGGGGAGGCGGGGTCGACCGCTCGC	mir-714	Precursor variant
TGGGAGGTTTGATGCTT	mir-6390	Precursor variant
GAGTCTTGCGCTGGGGGAGGCGGGGTCGACCGCTCGCGGGGTTGG	mir-714	Precursor variant
AGTTGCTCCTTGCTGTG	mir-6394	Precursor variant
GTGTGTTTGGGTCTAGCGCTGGGGGAGGCGGGGTCGACCGCTCGC	mir-714	Precursor variant
GTGTTTGGGTCTTGTGCTGGGGGAGGCGGGGTCGACCGCTCGCGG	mir-714	Precursor variant
GAGCACTGACTGCTCT	mir-3473f	Precursor
ACCTGCCTCTGCCTCCTGAATGCTGGGACT	mir-3470b	Precursor variant
GTAGCCCTGGCTGTCCTGGCACTC	mir-3470b	Precursor variant
GGGTCTGTCGCGGTGCCTGTAGCTGTCCCCGAGCCACGCTTCCTG	mir-696	Precursor variant
ATGTGTGTGTGTGTGTGTGTGTGTGTGTGT	mir-466i//mir-466q	Precursor variant
GCTGCGTGAGACTGTGTAACTGCTAGATCCTTGGACTTCCATTCA	mir-1194	Precursor variant
GTGTGTGTGTGTGTTTGT	mir-466i	Mature 5' sub variant
AGGCGGGGTCTACCGCTCGCGGGGTTGGCGCGGTCGCCCGGCGCC	mir-714	Precursor variant
TGTTTGGGTCGTGCTCTGGGGGAGGCGGGGTCGACCGCTCGCGGG	mir-714	Precursor variant
AAAACCTTCAGAAGGAAAGAATGTTG	mir-703	Precursor
AACTAGCCCTAAAAATGGAGGGCGCT	mir-6236	Precursor variant
AGAGATAAGAGCCAGAGTGCCCGCTGCCTGGCGCCTGACTTCGGC	mir-680-2	Precursor variant
ACTGAGCCATCTCTCCTGC	mir-3473f	Precursor variant
CCCAAGGCTGTCAATGAGGATCGATGTTCCAGAGATAAGATCCAG	mir-680-2	Precursor variant
CTGCTTTCCCGGGCGTGCTGCTTGCGTGTGCTTGCTGTGGGCAGC	mir-696	Precursor variant
GAGGGCCGGTCGGTGGCCCAGCGGTGGTTGTCTGT	mir-714	Precursor variant
CCGGCGCCGGCCCGCGGGACGCC	mir-712	Precursor
GTGTGTGTGTGTGTGTGTGAGTGTGT	mir-574//mir-466q	Precursor variant
TTTGGGTCTTGCGCTGGGGGAGGCGGGGTCGACCTCTCGC	mir-714	Precursor variant
AATCCCAGCACTCAGGAGG	mir-3470a//mir-8111	Precursor variant
TGGGTCTTGCGCTGGGGGAGGCGGGGTCGACCGCTCGCGG	mir-714	Precursor
GCACACACACACACACACACACACACACACACACACA	mir-466q	Precursor variant
TGGGTCTTGTGCTGGGGGAGGCGGGGTC	mir-714	Precursor variant
TGCTTTCCTGGGCTTGCTGCTTGCGTGTGCTTGCCGTGGGCAGCT	mir-696	Precursor variant
CGGTACCCGCTCCGGCGCC	mir-712	Precursor
GCTTTCCCAGGCTTGCTGCTTGCGTGTGCTTGCTGTGGGCAGCTT	mir-696	Precursor variant
TCCGGCGCAGGCCCGCGGGACGCCGCGGCGTCCGTGCGCCGATGC	mir-712	Precursor variant
AGATAAGATCCTCTGGGGAGGAGCGTAGTTACAGAAAGAAATGTG	mir-8108	Precursor variant
AATGATAACAATGCATCGTAAAACCTTC	mir-703	Precursor variant
CTTGCGCTGGGGGAGGCGGGGTCGGCCGCTCGCGGGGTTGGCGCG	mir-714	Precursor variant
GTGTGTGTGTGTGTATGTGTGTGTGTGTGTGT	mir-466q	Precursor variant
ACCCGGGCGATACCCGCTCCGGCGCCGGCCCGCGGGACGCCGCGG	mir-712	Precursor variant
GTCCTGGAACTCTCTCTGTAGACC	mir-3470b	Precursor variant
ATTGGGGGGGGGGGG	mir-8110	Precursor
ACAGAGAAACCCTGTCTTGAA	mir-5098	Precursor variant
ACACACACACACACACACACACACACATACAC	mir-466i//mir-466q	Precursor variant
ATATATATATATATATATATATAT	mir-467g	Precursor variant
ACAGCCAGGGCTATACAG	mir-5098	Precursor variant
GTGTTTGGGTCTTGCGCTGGCGGAGGCGGGGTCGACCGCTCGCGG	mir-714	Precursor variant
GCTTTCCCGGGCTTGCTGCTTGCATGTGCTTGCTGTGGGCAGCTT	mir-696	Precursor variant
TTGGGTCTTGCGCTGGGGGAGGCAGGGTCGACCGCTCGCGGGGTT	mir-714	Precursor variant
AACCAGCGCAGACTGGCGCGCCCAAGGGGTCTCTGGGCGAGTATC	mir-692-2//mir-692-3	Precursor variant
GTGTTTGGGTCTTGCGCTGGGGGCGGCGGGGTCGACCGCTCGCGG	mir-714	Precursor variant
AGCACACACACACACACACAC	mir-466i	Mature 5' super variant
ACCCGGGCGTTACCCGCTCCGGCGCCGGCCCGCGGGACGCCG	mir-712	Precursor variant
GTCTGTGTGTGTTTGGGTCTTGCACTGGG	mir-714	Precursor variant
GTGTGTGTGTGTGTGTATGTGTGTGTGT	mir-466q	Precursor variant
AGCCTAGCCTGACCCCC	mir-680-2	Precursor variant
GTGTGTTTGGGTCTCGCGCTGGGGGAGGCGGGGTCGACCGCTCGC	mir-714	Precursor variant
GTGTGTGTGTGTCTGTGTGTGTGTGTGTGTGT	mir-466q	Precursor variant
CGGATCCGTCTGAGCTTGGCAG	mir-127	Mature 3' sub/super variant
ACTCTGTAGACCAGGCTGGCCTCGAACTCAGAAAT	mir-3470b	Precursor variant
GAGCACTGACTGCTCTTG	mir-3473f	Precursor variant
GTGTGTTTGGGTCTTGCGCTGGGGGAGGCGGGGTCGACCGCTC	mir-714	Precursor
GTTCCAGAGATAAGATCCAGAGT	mir-680-2	Precursor
GTGTGTGTGTGTGTGTGTGTGTGTGTGTGTGTGTGTGC	mir-466q	Precursor variant
GGTGTGTGTGTGTGTGTGTGTGT	mir-466i	Mature 5' super variant
TTTTGGGTGATGCTGTGGAT	mir-719	Precursor
CTTTGTAGACCAGGCTGGCCTCGAACTC	mir-3470b	Precursor variant
TTTTGGTTTTGTTTTTT	mir-6240	Precursor variant
AGAGCATCATCCTCTCGGCCCCTGTC	mir-7060	Precursor variant
AAGGGTCTTGCGCTGGGGGAGGCGGGGTCGACCGCTCGCGGGGTT	mir-714	Precursor variant
TGAGCATTTTCTTTTGGTAAACAAGGAAAATGTCCGGGCTGCA	mir-8097	Precursor
ACCTGCTTCTGCCTCCC	mir-3470b	Precursor variant
CCAGCATCACCCTTT	mir-3970	Precursor
ACTCATTCTGTAGACCAGACTGGC	mir-3470b	Mature 5' super variant
ATATGTATGTATGTATGT	mir-297a-1	Precursor
AAACAGGATCTATCATGGTGGCACGGAGTCAGCTAGATGTTGTC	mir-546	Precursor
GTGTGTGTGTGTATGTGTGTGTGTGTGTGTGT	mir-466q	Precursor variant
AGTGAGTTCCAGGACAGCCAGGG	mir-3470b	Precursor variant
ACTCTATAGACCAGGCTGGCCTTGAACTC	mir-3470b	Precursor variant
GTTCCAGAGATAAGATCCAGAGTGCCCGCTGCCTGGCGCCCGACT	mir-680-2	Precursor variant
AGAGAAACCCTGTCTCGAAA	mir-706	Mature 5' sub variant
AGCCGTTAAAGGCTAGGCTCACAACC	mir-690	Precursor variant
GCTTTCCCGGGCTTGCTGCT	mir-696	Precursor
AGTGCTCTTAACCGCTG	mir-3473f	Precursor
GAGACAGGGTTTCTCTGTGTAGTCCTGGCTGTC	mir-5098	Precursor variant
GATTCAGATGGGCAGATTGGGAAGTAGT	mir-7670	Precursor variant
GTTTGGGTCTTGCACTGGGGGAGGCGGGGTCGACCGCTCGCGGGG	mir-714	Precursor variant
CCAAGGCTGTCAAGGAGGATCGATGTTCC	mir-680-2	Precursor variant
CTGCTTTCCCGGGCTTTCTGCTTGCGTGTGCTTGCTGTGGGCAG	mir-696	Precursor variant
AAGGAGCTTACAATCTAGCT	mir-708	Precursor
AAAAAACAAAAAAAAAAACAAAT	mir-706	Precursor variant
AGGGCATTTGGGCCTGGCTGGAGATCAGGTTTGCACACTGTCTTG	mir-3063	Precursor variant
AAGGAGCTTACAATCTAGCTGGT	mir-708	Mature 5' variant
GGGTCTTGCGCTGGGGGAGGCGGGGTCGACCGCTCGCG	mir-714	Precursor
ATTTTTTTTGTGTGTGGCAGTTGTAAGTT	mir-703	Precursor variant
GGTAGCGCACGCCTTTAGT	mir-3470b	Precursor variant
AATCCCAGCACTCGGGAGGCAGAGGC	mir-3470b	Precursor variant
GCTTTCCCGGGCTTGCTGCTTGCGTGTGCTTGCTGTGGGCAACTT	mir-696	Precursor variant
AAGAGAAACTCACTTCC	mir-874	Precursor variant
ATAATAGCCAGAAGCTGGAAGGAAC	mir-3472	Mature 3' sub/super
TCTATCATGGTGGCACGGAGTCAGCTAGATG	mir-546	Precursor
GAGTGTGTGTGTGTGTTC	mir-669h	Precursor variant
GTTGTGGACCATTTT	mir-703	Precursor
ATTAGTTTTCAAAAT	mir-703	Precursor
AAAGGCTAGGCTCAC	mir-690	Precursor
AGTTACAGAAAGAAA	mir-8108	Precursor
GAAGATAGTGACTGT	mir-672	Precursor
GAGAGATGGCTCAGC	mir-3473a	Mature 3' sub
ATTTTGTTCAAGAGT	mir-684-1//mir-684-2	Precursor
GTGTGTGGCAGTTTT	mir-703	Precursor
AGCCTTGGCTGTCCT	mir-3470b	Precursor
GTCTCTTGCTATCCC	mir-546	Precursor
CTCTGCCTCCCGAGT	mir-3470b	Precursor
AGTCTTCAGCCTGTC	mir-6917	Precursor
TAGAAGCAAAGTGAT	mir-546	Precursor
ATAAATAAGGCTGCT	mir-3472	Precursor
CACACACACACACAT	mir-466i//mir-1187//mir-466k	Precursor
GCCTTTAATCCCAGC	mir-8111	Precursor
ACTGTAAAGTGCTGT	mir-6383	Precursor
CGGTCGCCCTGCGGT	mir-714	Precursor
GCGGTGGTTGTCTGT	mir-714	Precursor
CTGGTTAATGATAAC	mir-703	Precursor
AGCCCTGGCTGGCTT	mir-1191a	Precursor
ATGTAGACCAGGCTG	mir-1191a	Precursor
GCTGGGATTAAAGGC	mir-8111	Precursor
AAGTAGGGATAAATT	mir-684-1//mir-684-2	Precursor
ATATATGCGGTGTGT	mir-568	Precursor
GCTGGCCTCGAACTC	mir-1195	Precursor
TCTGTAGACCAGGCT	mir-3470b	Precursor
AGGATAGCCAGGGCT	mir-1954	Precursor
AATACTGAGAGATGT	mir-883b	Precursor
AAGTTATTAGTTTTC	mir-703	Precursor
GTGTGTGTGTGTGTG	mir-466i//mir-1187//mir-669h//mir-466k//mir-466j//mir-466q	Precursor
GTCCTCTGTGTGACT	mir-1936	Precursor
GTTGTGGTGCTGACC	mir-26b	Precursor
GTTTTAGAAGCAAAG	mir-546	Precursor
GTGTGTTTGGGTCTT	mir-714	Precursor
AAGTTCTCACTGCAT	mir-1912	Precursor
GCTCCAAGGAAAGCT	let-7c-1	Precursor
CTTCACCCGGGCGGT	mir-712	Precursor
AGTGTGTGTGTGTGT	mir-669h	Precursor
GACTTCGGCCCCCAT	mir-680-1//mir-680-2	Precursor
AAGTCACTGGTCTGT	mir-7229	Precursor
ATAATTGGACTTGAT	mir-1902	Precursor
ACTGACTGCTCTTCC	mir-3473f	Precursor
ACTCTTGAACAAAAT	mir-684-1//mir-684-2	Precursor
GCTCTCCTGGACCCC	mir-7083	Precursor
GGCACCAGCTTCTCT	mir-6978	Precursor
GAGCCATCTCTCCAG	mir-690//mir-3473a//mir-3473b//mir-3473c//mir-6413//mir-3473e//mir-3473f	Precursor
GCTCTCTTACCCTTC	mir-6973b	Precursor
AATTCTTTGGAAAGT	mir-186	Precursor
AAAATGAATGAAAGC	mir-493	Precursor
TTTTTTTTTGTGTGT	mir-703	Precursor
TGTGTGTGTGTGTGT	mir-669c//mir-466i//mir-1187//mir-466k//mir-466q	Precursor
ACACACACACACACAC	mir-466i//mir-1187//mir-466k//mir-466q	Precursor
ATTAGTTTTCAAAATC	mir-703	Precursor
ATATACACACACACAC	mir-466i//mir-467f	Precursor
ACACACACACACAAAT	mir-466h	Precursor
AATCTGCTTAGAGAAC	mir-8097	Precursor
ACACACACACACATAT	mir-1187//mir-466k	Precursor
GGTAGAGCACTTGCCT	mir-1928	Precursor
AGCCTTGGCTGTCCTG	mir-3470b	Precursor
ATGCTATGAGTCGATC	mir-6244	Precursor
ATGTGTGTGTGTGTGT	mir-466i//mir-1187//mir-466k	Precursor
GTGTAGCCCTGGCTGT	mir-5098	Precursor
ATGCGGTGTGTGTATT	mir-568	Precursor
GTGGCAGTTTTAAGTT	mir-703	Precursor
TTTTGAGATGGCTTTT	mir-706	Precursor
GACAGGGTTTCTCTGT	mir-1195//mir-5098	Precursor
ACAGAGAAACCCTGTC	mir-1195//mir-5098	Precursor
GTGTGTGTGTGAGTGT	mir-574	Precursor
GGCGCGGTCGCCCGGC	mir-714	Precursor
GGTTAATGATAACAAT	mir-703	Precursor
GTTCCGTTTGACCAGC	mir-133b	Precursor
AAGATCCAGAGTGCCC	mir-680-2	Precursor
TGTGTGTGGCAGTTTT	mir-703	Precursor
TCTCCGCTTCTCCTTC	mir-712	Precursor
AAAAACAAAACAAAAC	mir-5098	Precursor
ACACACATACACACAC	mir-466f-1//mir-1187//mir-466q	Precursor
GTGTGTGTGTGTGTGT	mir-466i//mir-1187//mir-466k//mir-466q	Precursor
ATGTGTGTGTGTATGT	mir-466f-1//mir-466f-2//mir-466f-3//mir-1187	Precursor
ATGTCAGCAGATGCCC	mir-680-1//mir-680-2//mir-680-3	Precursor
GTTGAGCCATCTCACC	mir-3473a	Precursor
GTTTTAGAAGCAAAGT	mir-546	Precursor
AGACCTCTGGAAGAGC	mir-3473f	Precursor
GACCAGGCAGTGCTGT	mir-383	Precursor
TTAGAAGCAAAGTGAT	mir-546	Precursor
GGTTGTCTGTGTGTGT	mir-714	Precursor
GTTTGGGTCTTGCGCT	mir-714	Precursor
AAAGCTGTTGGGCTGT	mir-195b	Precursor
ATTTGTGTGTGTGTGT	mir-466h	Precursor
AGTGCTCTTAACCGCT	mir-3473f	Precursor
GCCGTTCCTGAGAAGG	mir-677	Precursor
ATCTCTCCCCGGGTCC	mir-711	Precursor
CGGTGGTTGTCTGTGT	mir-714	Precursor
ACTCTCAAGCACGACT	mir-692-2//mir-692-3	Precursor
CCGTCTGAGCTTGGCT	mir-127	Precursor
TGTGTGTGTGTGTGTG	mir-466i	Mature 5' sub
ACACACACACACACACC	mir-466i	Mature 5' sub variant
AAATGTTGCCTGAAGAA	mir-694	Precursor variant
ACTTTTTTGGTGGTGTT	mir-8091	Precursor variant
ATTTGTCTCTGGTCCAC	mir-6409	Precursor variant
TTGAGCGCCTCACTCTC	mir-692-1//mir-692-2//mir-692-3	Precursor
ACACACACACACACTCC	mir-669h	Precursor variant
ATTCTCTCATGTCTGTG	mir-467c	Precursor variant
AGAGTGAGTTCCAGGAC	mir-3470b	Precursor variant
ACAGAGCCCTGTACATC	mir-6404	Precursor variant
GTTGTCAGGAAGCCCTT	mir-129-1	Precursor variant
TTTTTGAGTTCAAGACC	mir-3470b	Precursor variant
AGGCTAGGCTCACAACC	mir-690	Precursor
AGCTATTTATGCAAAAT	mir-450a-1	Precursor
ACACCTTTAATCCCAGC	mir-8111	Precursor variant
ACTCTGTAGACCAGGCT	mir-3470b	Mature 5' sub
AGTGTTACCGTGAGCCT	mir-3062	Precursor
ACTCTGTAGACCAGACT	mir-3470b	Mature 5' sub variant
AGACTCTGTCTCAAAAC	mir-1192	Precursor variant
AGTCAGGGCTCTGCTGT	mir-6990	Precursor variant
TGGCTGTCCTGGAACTC	mir-3470b	Precursor variant
GTTTTCACCTCCCTCCC	mir-6986	Mature 3' sub variant
CGTTAAAGGCTAGGCTC	mir-690	Precursor variant
GCCTCTGCCTTCCCAGT	mir-709	Precursor variant
AGGCCAGCCTGGGCTAC	mir-3470a//mir-3470b	Precursor variant
AGGCCATCCTCTGCTAC	mir-6369	Precursor variant
ATCCAGATGTGACCCCC	mir-6406	Precursor variant
GTTGGGATTAAAGGCGT	mir-8111	Precursor variant
AGATGTTGTCTCTTGCT	mir-546	Precursor
CAGGCTGGTCTTGAACT	mir-3470b	Precursor variant
GTGCTACCATGTCTGGC	mir-7652	Precursor variant
ATGCCTTTAATCCCAGC	mir-3470b//mir-8111	Precursor variant
ATCTTCCCTGACCCACC	mir-6769b	Precursor variant
AAGCACTGCAACACCCC	mir-322	Precursor variant
AGCCTGGTCTACAGAGC	mir-3470b	Mature 5' sub variant
GACTCAGGGAGGAGAGC	mir-7016	Precursor variant
AAAACAAATAAACAAAC	mir-706//mir-1192	Precursor variant
GTTCCTGGGAAAACTGT	mir-6402	Precursor variant
TTGTGTGTGGCAGTTTT	mir-703	Precursor
GTTTGAGACAGGGTTTC	mir-706//mir-1954//mir-5098	Precursor variant
CACACACACACACACAC	mir-466i	Mature 5' sub
ACAGAGAAACCCTGTCT	mir-1195//mir-5098	Precursor
GCTTTAATTTCTGTGAC	mir-6382	Precursor variant
ATCGACAAGCGCGCCTT	mir-6357	Precursor variant
ACTGTAAAGTGCTGTGT	mir-6383	Precursor
AAAGTTTTGTAAGAAAC	mir-1892	Precursor
GAGATGGCTCAGTGGGT	mir-3473f	Precursor variant
GATGGTCTTGGCTAAGT	mir-3101	Precursor variant
GTTGTTGTTGTTGTTGT	mir-5106	Precursor variant
TGGGATTAAAGGTGTGC	mir-8111	Precursor variant
ACCCACTGAGCCATCTC	mir-3473f	Precursor variant
GTGTGGCAGTTTTAAGT	mir-703	Precursor
GAATGGCGCTGATCTGA	mir-465c-1//mir-465c-2	Precursor
GATCTTCTGGGAAGTTC	mir-6371	Precursor variant
GCTATGTAGACCAGGCT	mir-1191a	Precursor
GCGGTGGTTGTCTGTGT	mir-714	Precursor
CTGCTATGTGGAGCTGC	mir-1258	Precursor
GACATAGAAAGGGCAGT	mir-3112	Precursor variant
AAACCATTTTGTAAGAC	mir-5101	Precursor variant
AATTGAGAAAATGCCTT	mir-3471-1//mir-3471-2	Precursor variant
GGATTTATTTTGCAAAC	mir-1839	Precursor variant
ACTGTGAGTGATTTTCT	mir-5620	Precursor variant
GTGTCTGCAATACCAAA	mir-6346	Precursor variant
ATTTTCCTCCTTCTTCT	mir-1903	Precursor variant
ACTTAGGAGGCAGAGGC	mir-3470a	Precursor variant
GCCTGTCCTGCCAACCC	mir-7069	Precursor variant
GAGATGGCTCAGTAGGT	mir-8115	Precursor variant
AGTCCTCTGTGTGACTT	mir-1936	Precursor variant
AGACATTTCAGTGTTCC	mir-6928	Precursor variant
ACTTCTGCGGCTCAGCC	mir-22	Precursor variant
AGTGTAGCCCTGGCTGT	mir-5098	Precursor variant
ATTTCCCTGGAGTTAAT	mir-763	Precursor variant
GCCTCTGCCTCCCGAGT	mir-3470b	Precursor
TTCTGAGTGCTAAAAGT	mir-7243	Precursor variant
ACAGTGAGGAAAAAAAT	mir-350	Precursor variant
ATGGTAGAATTCACTGT	mir-183	Precursor variant
ACGCCTTTAATCCCAGC	mir-8111	Precursor
ACGCCTTTAATCCCAAC	mir-8111	Precursor variant
GTAGCCCTGGCTGACTT	mir-1191a	Precursor variant
ACTTTTCTACTTTCCAA	mir-423	Precursor variant
AGAAAGTGTGCAAACCT	mir-3063	Precursor variant
AATCCCAGCACTCGGGA	mir-3470b	Precursor variant
AGCTGAGCAGTGGTGGC	mir-1946b	Precursor variant
TCAGTGCACTACAGAAC	mir-148a	Precursor
GCCTCTGCCTCCCAAGT	mir-709//mir-3470b	Precursor variant
ACAGCTTGTCCAAAGGC	mir-5125	Precursor variant
ACTTCTTTCACCTCTGT	mir-599	Precursor variant
GAAAGTGTTACTCAGAA	mir-6360	Precursor variant
CTACAGAGTGAGACCCT	mir-1954	Precursor variant
AAGGCAAGTGCTCTACC	mir-1928	Precursor variant
AGTGTTGGACAGAGAAC	mir-184	Precursor variant
GTGTGTATATATATATA	mir-467g	Precursor
CTGCGGTGGTTGTCTGT	mir-714	Precursor
ATTCTCTTTTTAAAAAT	mir-3473a	Precursor variant
GTCTTTTTCCTTGCTAT	mir-7657	Precursor
GATTGACATGAACACCT	mir-713	Precursor variant
ACTTTGTAGACCAGGCT	mir-3470a	Mature 5' sub
GAGCCTAGCCTGACCCC	mir-680-2	Precursor variant
ACCTTCTGCTGGAGACT	mir-1194	Precursor variant
CTGTCCTGGAACTCACT	mir-3470b	Precursor variant
AGGCTGGCCTTGAACTC	mir-3470b	Precursor
ATCTCTGGAAAGCAAAC	mir-6351	Precursor variant
ATCTCTTTGAGCGCCTC	mir-692-1//mir-692-2//mir-692-3	Precursor
AGAGGCTGTCAAGAAGC	mir-7225	Precursor variant
AATCCAGGATAGGCTTT	mir-26a-1//mir-26a-2	Precursor variant
GTCTCCGCTTCTCCTTC	mir-712	Precursor variant
GTTTCCAGCTTCTGGCT	mir-3472	Precursor variant
GCCACTACTGCCCGGCT	mir-1946a	Precursor variant
ATTTTTGGTTTTGTTTT	mir-6240	Precursor variant
ACGATAGCCATAACCTC	mir-374b	Precursor variant
GAGTTTGAGGCCAGCCT	mir-1195	Precursor variant
ACTAGGAACCAAACACT	mir-325	Precursor variant
ATGCCTTTAGTCCCAGT	mir-3470b	Precursor variant
GTTTGGGTCTTGCGCTG	mir-714	Precursor
ATGCCTTTAGTCCCAGC	mir-3470b	Precursor
ACCTGCCTCTGCCTCCC	mir-3470b	Precursor
ACTCAGGAGGCAGAGGC	mir-3470a	Precursor
GGCAGTTTTAAGTTATT	mir-703	Precursor
GTGTGTGTTTGGGTCTT	mir-714	Precursor
ACTTTTTAAAGATATTT	mir-3473a	Precursor variant
ATCTATCTATCTGTGAA	mir-6395	Precursor variant
TAGTTTTCAAAATCAGT	mir-703	Precursor
ACAAAAGGGAAGCACTC	mir-294	Precursor variant
GCTCAGACCTGTGGTGC	mir-6715	Precursor variant
AGTTTTAAGTTATTAGT	mir-703	Precursor
ATACTGTAAAGTGCTGT	mir-6383	Precursor variant
AGATGTTCTGTTCTGCT	mir-6932	Precursor variant
ATGTCCTCTGTGTGACT	mir-1936	Precursor variant
ACGACTAGGAGGCCTCT	mir-692-2//mir-692-3	Precursor
CTGTTCTGCACCTTTCC	mir-6997	Precursor variant
GTTTGTTTGTTTGTTTT	mir-1192	Precursor
GTTTCACAAGACTCAAA	mir-7039	Precursor variant
ATTGGCTTCTTTGGAAT	mir-7216	Precursor variant
ATTTAGTGTGTGTGATC	mir-32	Mature 3' sub variant
GTCAGCAGATGCCCACT	mir-680-1	Precursor
AGACAGGGTTTCTCTGT	mir-1195//mir-5098	Precursor
ACACACACACACACACAC	mir-466i	Mature 5' sub
AAATGTTGCCTGAAGAAG	mir-694	Precursor variant
ACACACACACACACAAAT	mir-669c//mir-466h//mir-466i//mir-1187//mir-466k	Precursor variant
ACACACACACACACATAC	mir-466i	Precursor
TCTTTCCAGCTTCTGGCT	mir-3472	Precursor
GTGAGTGTGAGTGTGTGT	mir-574//mir-669h	Precursor variant
ACCTCTCTGTTCTCCTCC	mir-7056	Precursor variant
TGTAAACATCCGACTGGA	mir-30e	Mature 3' sub variant
ACACCTTCTGCTGGAGAC	mir-1194	Precursor
GCTCTTAACTGCTGAGCC	mir-6380//mir-3473f//mir-8115	Precursor variant
AAAGGCTAGGCTCACAAC	mir-690	Precursor
ACTTGGTCCCCTGCCCAC	mir-7115	Precursor variant
CAGGCTGACCTTGAACTC	mir-3470b	Precursor variant
GTGTGTGTGTGTAAGTGT	mir-574//mir-466q	Precursor variant
ACTTACTGAAGGGACAGC	mir-504	Precursor variant
CTCCTTCACCCGGGCGGT	mir-712	Precursor
ATATGTATGTGTGTATAT	mir-467g	Precursor variant
AGAGATGGCTCAGTGGTT	mir-3473f	Precursor
GTAGACCAGGCTGGCCTT	mir-3470a//mir-3470b	Precursor
GTAGACCAGGCTGGCCTC	mir-3470a//mir-3470b	Precursor variant
GCCCTGCGGTGGTTGTCT	mir-714	Precursor
AAAAGTATGTGCCACCAC	mir-1946a//mir-1946b	Precursor variant
ATATATATATATATATAT	mir-467g	Precursor variant
ACACTCACACACACAGAC	mir-574	Precursor variant
GCTTCTTTGCCTGCTTGC	mir-1194	Precursor variant
GCCTTACAGCTGGATCTC	mir-3471-1//mir-3471-2	Precursor variant
ATCTGAGTGTCTACTTGT	mir-466f-4	Precursor variant
GTGTGTGTGTGCGTGTAT	mir-466i//mir-466q	Precursor variant
CAGGCTGGCTTTGAACTC	mir-3470b	Precursor variant
ACAGAGAAACCCTGTCTC	mir-1195//mir-5098	Precursor
ACTGCCTGGTAATGATGA	mir-200b	Precursor
ACATATATACATACATAC	mir-297a-1//mir-467g	Precursor variant
ATGATTGCCACATTCTGT	mir-509	Precursor variant
GAGATAGGGTTTCTCTGT	mir-1195//mir-5098	Precursor variant
GTGTGGCAGTTTTAAGTT	mir-703	Precursor
TTATGTGACTATATAAAT	mir-6338	Precursor variant
ATATGTGTCTGTGTGTGT	mir-1187//mir-466k	Precursor variant
TTTGTGTGTGGCAGTTTT	mir-703	Precursor
GCTCTTAACCACTGAGCC	mir-3473d//mir-3473f//mir-8115	Precursor variant
GATCAGGTTTCTGTCTTT	mir-6354	Precursor variant
AGTATGGATTCTCTGTTC	mir-541	Precursor variant
ATAAAGGGCTCACAACTT	mir-7058	Precursor variant
GTCTATATGTATGTGTCT	mir-100	Precursor variant
AAGTGTGTGTGTGTGTAT	mir-467f	Precursor variant
AGGGCTATACAGAGAAAC	mir-1954//mir-5098	Precursor variant
AATACAACCTGCTAAGTG	mir-374c	Mature 5' sub
AGATCTTCTGGGAAGTTC	mir-6371	Precursor variant
ACACACATATATATATAT	mir-1187//mir-467g	Precursor
TCAGCACATCATGGTTTA	mir-15b	Mature 5' sub variant
AAGGGGCCTTTCCCCCTT	mir-3471-2	Precursor variant
GGGCTGGTGAGATGGCTC	mir-1934//mir-3473a	Precursor
GTGTGTGTGTGTGAGTGT	mir-574	Precursor
CCCATGTCAGCAGATGCC	mir-680-1//mir-680-2//mir-680-3	Mature 5' sub
ATTATACTCTGTGTGAAT	mir-652	Precursor variant
ATGTGTGTGTGTATATAT	mir-466i//mir-467g	Precursor
GCTCTTAACCTCTGAGCC	mir-3473f	Precursor variant
GTCTGTGTGTGTTTGGGT	mir-714	Precursor
ATATTTCTACTCTTGACC	mir-1892	Precursor
GTTCTGAGTGCTAAAAGT	mir-7243	Precursor variant
TTGAGACAGGGTCTGACT	mir-1192	Precursor variant
GATAAAGGGCTCACAACT	mir-7058	Precursor variant
ATGTGTAGCCCTGGCTGT	mir-5098	Precursor variant
GTGTGTGTGTGTGTGTAC	mir-466k	Precursor
GTGTGTGTGTGTGTGTGC	mir-466i	Mature 5' sub variant
GTGTGTGTGTGTGTGTGT	mir-466i	Mature 5' sub
TGAGGCAGGGGGATGACC	mir-5620	Mature 3' sub variant
GTGTGTGTGTGTGTGAGT	mir-466i	Mature 5' sub variant
TTTGAGCGCCTCACTCTC	mir-692-1//mir-692-2//mir-692-3	Precursor
GAGCCTAGCCTGACCCCC	mir-680-2	Precursor variant
ATTTTTTTTGTGTGTGGC	mir-703	Precursor variant
GTGTGTGTGTATATATGT	mir-466i//mir-467f//mir-467g	Precursor variant
AGAAATCTGCCTGCCTCT	mir-1195	Precursor variant
ACTCATAGTCATCCCCCT	mir-5620	Precursor variant
AATCCCCCAGAAGCCACT	mir-7230	Precursor variant
ATTCTAGGCAAGTGCTCT	mir-1928	Precursor variant
AAAGCATCGCTCCCTCCT	mir-218-2	Precursor variant
AGACTGGTTAATGATAAC	mir-703	Precursor
AGCTGAGAGAAGGCTATT	mir-298	Precursor variant
GGTTGTCTGTGTGTGTTT	mir-714	Precursor
AGCTGGTTGGTGGAAGCC	mir-6939	Precursor
AAAGCACTTAGTGTCCAT	mir-7093	Precursor variant
AAGTGCTGGGACTAAAGG	mir-3470b	Precursor variant
GTGTGTATGTGTCTGTGT	mir-466i	Mature 3' sub variant
ATGTTTTAGAAGCAAAGT	mir-546	Precursor
GGTCGCCCTGCGGTGGTT	mir-714	Precursor
CGGTGGTTGTCTGTGTGT	mir-714	Precursor
GTTTTTGTTTTTTGAGAC	mir-706	Precursor variant
AGAAATCCACCTGCCTCT	mir-1946a	Precursor variant
GATTGATTTTTTTTCTTT	mir-6236	Precursor variant
CAGTGCAATAGTATTGTC	mir-301a	Precursor
TTGTGTGTGTATGTGTGT	mir-669n	Mature 5' sub variant
GTGAGTGTGTGTGTGTGT	mir-669h	Precursor
GTGTGTGAGTGTGTGTGT	mir-669h	Precursor
ACACACACACATACACAC	mir-466i	Mature 3' sub
GTCAGCAGATGCCCACTT	mir-680-1	Precursor
AGTAGGTGCTCAATAAAC	mir-325	Precursor variant
ATGTAGCCCTGGATGGCCT	mir-1191a	Precursor variant
AATGATAACAATGCATCGT	mir-703	Precursor variant
GTTGTGGACCATTTTTTTT	mir-703	Precursor
AGTGGCCCCCTGGTCTGGC	mir-133b	Precursor variant
GTGCTGTTGGTCGGGTTGT	let-7i	Precursor
AAAGGCTATGCTCACAACC	mir-690	Precursor variant
ATCATGGTGGCACGGAGTC	mir-546	Precursor
GACTGCTCTTCCAGAGGTC	mir-3473f	Precursor
ATACTGTAAAGTGCTGTGT	mir-6383	Precursor variant
GGCTGTCCTGGAACTCACT	mir-3470b	Precursor variant
CGGTCGCCCTGCGGTGGTT	mir-714	Precursor
ATATATATATATATATATA	mir-467g	Precursor variant
TCTCCTTCACCCGGGCGGT	mir-712	Precursor
CGAGACAGGGTTTCTCTGT	mir-1195//mir-5098	Precursor variant
AACTCACAGAGCTCTGCCT	mir-1195	Precursor variant
ACAGATGTTCTGTTCTGCT	mir-6932	Precursor variant
AAACTTGGGTCCTCTGCAA	mir-5124a	Precursor variant
TGAGTTCAAGGCCAGCCTT	mir-3470b	Precursor variant
GAGATTTGCTGTTGTGCTT	mir-218-1	Precursor variant
AAAGGCTAGGCTCACAACC	mir-690	Precursor
GTTTTAGAAGCAAAGTGAT	mir-546	Precursor
GTCCTGGAACTCACTCTGT	mir-3470b	Precursor variant
GTAGACCAGGCTGGCCTCA	mir-3470a	Precursor variant
GCCCAGCCCTCAGCCTCTT	mir-6981	Precursor variant
AAAACGCTGCTTTGAAAAT	mir-5129	Precursor variant
GCGGTGGTTGTCTGTGTGT	mir-714	Precursor
GCTCTTAACTGCTGAGCCA	mir-3473f//mir-8115	Precursor variant
AGGGCTGGCGAGATGGCTC	mir-3473b	Mature 3' sub/super variant
ATGCTCCAGTGGCGCAATC	mir-1983	Precursor
TGGTTAATGATAACAATGC	mir-703	Precursor
ACGACTAGTAGGCCTCTGT	mir-692-2//mir-692-3	Precursor variant
AAAGGCTACGCTCACAACC	mir-690	Precursor variant
AGTGCTGGGGATCGAACCC	mir-6364	Precursor variant
CTTGTGTGTGTGTGTGTGT	mir-669c	Precursor variant
CCTCCCGAGTGCTGGGATT	mir-3470b	Precursor variant
AGGCCATCCTCTGCTACAT	mir-6369	Precursor variant
AGAATAGCCAGGGCTACAC	mir-1954	Precursor variant
AGTGTGTGTGTGTGTGTGT	mir-574//mir-466i	Mature 5' sub variant
GTCTGTGTGTGTTTGGGTC	mir-714	Precursor
GTAGTGTTACCGTGAGCCT	mir-3062	Precursor
GTGTGTGTGTGTGTGTGTC	mir-466i	Mature 5' sub variant
TTCCTATGCATATACTTCT	mir-202	Mature 5' sub
GTGTGTGTGTGTGTGTGTG	mir-466i	Mature 5' sub
AGCCCCCATGTCAGCAGAT	mir-680-1//mir-680-2//mir-680-3	Precursor variant
AGTTAGATCTCATGGAGGC	mir-3471-1//mir-3471-2	Precursor variant
AAATGTTGCCTGAAGAAGT	mir-694	Precursor variant
TTTTGTGTGTGGCAGTTTT	mir-703	Precursor
GTGTAGCCCTGGCTGTCCT	mir-1954//mir-3470b	Precursor variant
CAGCTAGATGTTGTCTCTT	mir-546	Precursor
AAAGGCTAGGCTCATAACC	mir-690	Precursor variant
ACTGGAGAGATGGATCAGC	mir-3473f	Precursor variant
AAGACTGGTTAATGATAAC	mir-703	Precursor variant
ACGACTAGGAGGCCTCTGT	mir-692-2//mir-692-3	Precursor
TGTAAACATCCTTGACTGG	mir-30e//mir-30f	Precursor
AGACTAGTGATTTTGTTTT	mir-7a-1//mir-7a-2	Precursor variant
GTGGTGGTTGTCTGTGTGT	mir-714	Precursor variant
AAAGGCCAGGCTCACAACC	mir-690	Precursor variant
GGTGTACGCCTTTAATCCC	mir-8111	Precursor variant
AAGGCTGTCGAGGAGGATC	mir-680-2	Precursor variant
ACAGAGTGAGTTCCAGGAC	mir-3470b	Precursor variant
ATTTCTGGTCTGTTGACAT	mir-1969	Precursor variant
TGAGGTAGTAGGTTGTATG	let-7c-1//let-7c-2	Precursor
ATGTCAGCAGATGCCCACT	mir-680-1	Precursor
GTGGCAGTTTTAAGTTATT	mir-703	Precursor
AAACAAACAAACAAACAAAC	mir-1192	Precursor variant
TAGCAGCACGTAAATATTGG	mir-16-1//mir-16-2	Mature 5' sub
ACTTTGTAGACCAGGCTGGC	mir-3470a	Mature 5' sub/super
AGATCGATGTGGTGCTCCGG	mir-5099	Mature 3' sub/super variant
GTGTGTGGCAGTTTTAAGTT	mir-703	Precursor
TGAGGTAGTAGATTGTATAG	let-7f-1//let-7f-2	Mature 5' sub
AAGCTGCCAGTTGAAGAACT	mir-22	Mature 3' sub
ACACACACACACACACACAC	mir-466i	Mature 5' sub/super
GCGTGTGTGTGTGTGTGTGT	mir-466i	Mature 5' sub/super variant
GCTATCCCTGTGCTAGTTCC	mir-546	Precursor
GTGTGTGTGTATGTGTGTGT	mir-466q	Precursor
TCTTTGGTTATCTAGCTGTA	mir-9-2//mir-9-1//mir-9-3	Precursor
ATATATATATATATATATAC	mir-467g	Precursor variant
ATATATATATATATATATAT	mir-467g	Precursor variant
GCCTCCCGAGTGCTGGGATT	mir-3470b	Precursor variant
ATAAGGACATTGGAAGAAGG	mir-1194	Precursor
ATGTGTGTGTGTGTGTGTGT	mir-466i//mir-1187//mir-466k	Precursor
GTGTGTGTATGTGTGTGTGT	mir-466f-1	Precursor
GGAGAGATGGCTCAGTGGTT	mir-3473f	Precursor
GGGATTAAAGGCGTGTGCCA	mir-1946b	Precursor variant
AGCACTCGGGAGGCAGAGGC	mir-3470b	Precursor
GTGTGTGTGTGTGTGAGTGT	mir-574	Mature 5' sub variant
AGAGGTAGTAGGTTGCATAG	let-7d	Mature 5' sub
AGAGTACTGACTGCTCTTCC	mir-3473f	Precursor variant
GGCTCAGCGGTTAAGAGCAC	mir-3473f	Precursor
AAAGGCTAGGCTCACAACCG	mir-690	Mature 3' sub variant
ACACAGAGAGACCCTGTCTC	mir-1195//mir-5098	Precursor variant
ATGTGTGTGTAGGTGTCTGT	mir-467a-1//mir-467d//mir-467a-2//mir-467a-3//mir-467a-4//mir-467a-5//mir-467a-6//mir-467a-7//mir-467a-8//mir-467a-9//mir-467a-10	Precursor variant
TACAGTATAGATGATGTACT	mir-144	Mature 3'
GTGTGGCAGTTTTAAGTTAT	mir-703	Precursor
GAGTTCAAGGCTAGCCTGGT	mir-3470b	Precursor variant
GAATGGAAGTCCAAGGATCT	mir-1194	Precursor
ACTAATTGAGAAAATGCCTT	mir-3471-1//mir-3471-2	Precursor variant
GTGTGTGTGTGTGTGTGAGT	mir-466i	Mature 5' sub/super variant
TTTTTGTGTGTGGCAGTTTT	mir-703	Precursor
ACTGAGCCATCTCTTCAGCC	mir-3473f	Precursor variant
AGCTCAGTGGTAGAGAACTT	mir-1928	Precursor variant
GCACACACACACACACACAC	mir-466i	Mature 5' sub/super variant
GCCTCCCAAGTGCTGGGACT	mir-3470b	Precursor variant
AGTGGTTAAGAGCACTGACT	mir-3473f	Precursor variant
ACTCTGTAGACCAGGCTGGC	mir-3470b	Mature 5' sub/super
TTCACAGTGGCTAAGTTCTG	mir-27b	Mature 3' sub
GTGTGTGTGTGTGTGTGTCT	mir-466i	Mature 5' sub/super variant
TTCACAGTGGCTAAGTTCCG	mir-27a	Mature 3' sub
GTGTGTGTGTGTGTGTGTGT	mir-466i	Mature 5' sub/super
GCCTCCTGAGTGCTGGGATT	mir-3470a//mir-8111	Precursor variant
GTTTGTTTGTTTGTTTTAAC	mir-1192	Precursor variant
ACCAGGAGGCTGAGGTCCCT	mir-665	Mature 3'
TACAGTACTGTGATAGCTGA	mir-101b	Mature 3' sub/super
AGAGGCCCCTTAAGGAGACC	mir-665	Precursor variant
AGCACTTGGGAGGCAGAGGC	mir-709//mir-3470b	Precursor variant
ACACACACACACACATATAT	mir-1187//mir-466k	Precursor
TTTTTGAGACAGGGTCTCTC	mir-706	Mature 5' sub variant
AAGCCGGGCAGTGGTGGCGC	mir-1946b	Precursor variant
TGTAAACATCCTTGACTGGA	mir-30e	Mature 5' sub
GAGTGTGTGTGTGTGTGTGT	mir-574	Mature 5' sub variant
AGACTGGTTAATGATAACAAT	mir-703	Precursor
AATGATAACAATGCATCGTAA	mir-703	Precursor variant
AGTGTTCTTAACTGCTGAGCC	mir-6380//mir-3473f	Precursor variant
GTTGTGGACCATTTTTTTTGT	mir-703	Precursor variant
AGACTAGGCTGGCCTTGAATT	mir-3470a//mir-3470b	Precursor variant
GAGTTCGAGGCCAGCCTGGGC	mir-1195	Mature 5' sub variant
ACACACACACACACACACACA	mir-466i	Mature 5' super
AGAAATCTGCCTGCCTCTGCC	mir-3470a	Precursor variant
AGCCCTGGCTGTCCTGGAACT	mir-3470b	Precursor variant
AGTGCTCTTAACCTCTGAGCC	mir-3473f	Precursor variant
AGAGTGAGTTCCAGGACAGCC	mir-3470b	Precursor variant
AGTCAGTGCTCTTAATCGCTG	mir-3473f	Precursor variant
AGTGTCACATGATGCAAACCT	mir-1929	Precursor variant
CTTGGTACATCTTTGAGTGAG	mir-547	Mature 3'
GACTGCTCTTCCAGAGGTCTT	mir-3473f	Precursor variant
GGCTGTCCTGGAACTCACTCT	mir-3470b	Precursor variant
ACGCCTTTAATCCCAGCACTT	mir-8111	Precursor variant
GTTTTTCGAGACAGGGTTCCT	mir-706	Mature 5' sub/super variant
AAGATCATTTTGTTCAAGAGT	mir-684-1//mir-684-2	Precursor variant
TGAGACAGGGTTTCCCTGTGT	mir-1195//mir-5098	Precursor variant
ATCACATCGCCAGGGATTACC	mir-23b	Mature 3' variant
AGTTTTAAGTTATTAGTTTTC	mir-703	Precursor
GGTGTGTGTGTGTGTGTGTGT	mir-466i	Mature 5' super variant
TTCAAGTAATCCAGGATAGGC	mir-26a-1//mir-26a-2	Mature 5' sub
TTCGAGGCCAGCCTGGGCTAC	mir-3470b	Precursor variant
AGGGCTACAGAGTGAGACCCT	mir-1191a	Precursor variant
AAGTTATTAGTTTTCAAAATC	mir-703	Precursor
AGTTATTAGTTTTCAAAATCA	mir-703	Precursor
GTCTCTTGCTATCCCTGTGCT	mir-546	Precursor
AGAAGAGCAGTCAATGCTCTT	mir-3473f	Precursor variant
TCTCTTTGAGCGCCTCACTCT	mir-692-1//mir-692-2//mir-692-3	Mature 3' sub/super
TGTGCAAATCCATGCAAAACT	mir-19b-2//mir-19b-1	Mature 3' sub
GGAAGAGCAGTCGATGCTCTT	mir-3473f	Precursor variant
ACTCCCCTACCCAGCACCCTC	mir-1982	Precursor variant
AGAGCTACACAGTGAGAACCT	mir-1191a	Precursor variant
AAGAGTACTGACTGCTCCTCC	mir-3473f	Precursor variant
AAAGGCTAGGCTCACAACCAA	mir-690	Mature 3' sub
GTTGTTGTTGTTGTTGTTGTT	mir-5106	Precursor variant
TACCTCTGCCTCCCAAGTGCT	mir-709//mir-3470b	Precursor variant
AGCCTCCTGAGTGCTGGGATT	mir-3470a//mir-8111	Precursor variant
AAATATAAGGGACATTTCAGT	mir-7061	Precursor variant
ATGTTTTAGAAGCAAAGTGAT	mir-546	Precursor
TGAGGTAGTAGTTTGTGCTGT	let-7i	Mature 5' sub
ATGCGGGATGTTCATCCTCCT	mir-448	Precursor variant
AGTCCCAGCACTGGGGAAGCA	mir-3470b	Precursor variant
AGCCTTGTCTGTCCTGGAACT	mir-3470b	Precursor variant
ACCTGCTTCTGCCTGCCGAGT	mir-3470b	Precursor variant
GTGTGGCAGTTTTAAGTTATT	mir-703	Precursor
ATGGCCTCCAGCAGAAGGTGT	mir-1194	Precursor variant
AGACCAGGCTGACCTGGAACT	mir-3470b	Precursor variant
GCTGGGATTGAAGGTGTGCAC	mir-8111	Precursor variant
GCGGTGGTTGTCTGTGTGTGT	mir-714	Precursor
AAGAGTACTGACTCCTCTTCC	mir-3473f	Precursor variant
GCTGCTTAGAAGTCTGCCCCT	mir-7035	Precursor variant
AACACACACACACACACACAC	mir-466i	Mature 5' super variant
AAAGTTGCTCCTTGCTGTGAC	mir-6394	Precursor variant
AGACCAGGCTGGCCTGGAACT	mir-3470b	Precursor variant
ATACTAGGCAAGTGCTCTACC	mir-1928	Precursor variant
ACAGAGAAACCCTGTCTCGAA	mir-5098	Precursor variant
AGAGAAACCCTGTCTCAAAAC	mir-706	Mature 5' sub variant
AGAGAAACCCTGTCTCAAAAA	mir-706	Mature 5' sub
GTGTGTGTGTGTGTGTGATGT	mir-669p-1//mir-669p-2	Precursor variant
GCCTGCCTCTGCCTCCCAAGT	mir-709//mir-3470a//mir-3470b	Precursor variant
GGCTAAGCGGTTAAGAGCACT	mir-3473f	Precursor variant
TTCTCTGTATAGCCCTGGCTG	mir-5098	Precursor variant
AGTGCTCTTAGCCGCTGAGCC	mir-3473f	Precursor variant
TGTGACAGATTGATAATTGAA	mir-542	Mature 3' sub variant
CTTGTGTGTGTGTGTGTGTGT	mir-669c	Precursor variant
GCTTGACTTGAAGGGAAAACT	mir-684-1	Mature 3' super
ACAGCTGGATCTCGTGGAGGC	mir-3471-1//mir-3471-2	Precursor variant
GGCTCAGTGGGTAAGAGCACT	mir-3473d//mir-3473f	Precursor variant
ACTCTGTAGACCAGGCTGGCC	mir-3470b	Mature 5' sub/super
ACACCTTTAATCCCAGCACTT	mir-1946a//mir-8111	Precursor variant
ACCTTTTGCTGGAGACAATAT	mir-1194	Precursor variant
GAGTTTGAGGCCAGCCTGGTC	mir-1195	Mature 5' sub variant
TTCACAGTGGCTAAGTTCTGC	mir-27b	Mature 3'
GTCTGTGTGTGTTTGGGTCTT	mir-714	Precursor
GCCTCTGCCTCCCAAGTGCTG	mir-709//mir-3470b	Precursor variant
TTCCTATGCATATACTTCTTT	mir-202	Mature 5'
[truncated: 3,660 more rows]
